# Supplementary material for: Synthesis of functionalized alkenes via Cu(i)-catalysed allylation of acetanilides using Morita–Baylis–Hillman bromides
Source: Royal Society of Chemistry journal article supplement (doi:10.1039/d3ob01480k), 2023-01-01

## **SUPPLEMENTARY INFORMATION**

### **Synthesis of functionalized alkenes via Cu(I)-catalysed allylation of acetanilides using Morita-Baylis-Hillman bromides**

Ramesh Kumar Vishwakarma, and Krishna Nand Singh\*

Department of Chemistry, Institute of Science, Banaras Hindu University, Varanasi-  
221005, India

\*E-mail: [knsingh@bhu.ac.in](mailto:knsingh@bhu.ac.in); [knsinghbhu@yahoo.co.in](mailto:knsinghbhu@yahoo.co.in)

# Table of Contents

|                                                                                                                                                              |            |
|--------------------------------------------------------------------------------------------------------------------------------------------------------------|------------|
| <b>1. Copies of <math>^1\text{H}</math>, <math>^{13}\text{C}\{^1\text{H}\}</math> and <math>^{19}\text{F}</math> Spectra of the Products 3a-3v and 4a-4m</b> | <b>S1</b>  |
| <b>2. NOESY Spectrum of the Product 3e</b>                                                                                                                   | <b>S39</b> |
| <b>3. NOESY Spectrum of the Product 4b</b>                                                                                                                   | <b>S40</b> |
| <b>4. HRMS of the TEMPO Adduct 3a'</b>                                                                                                                       | <b>S41</b> |

# 1. Copies of $^1\text{H}$ , $^{13}\text{C}\{^1\text{H}\}$ and $^{19}\text{F}$ Spectra of the Products 3a-3v and 4a-4m

## *N*-(4-(2-Cyano-3-phenylallyl)phenyl)acetamide (3a):

$^1\text{H}$  NMR,  $\text{CDCl}_3$ , 500 MHz

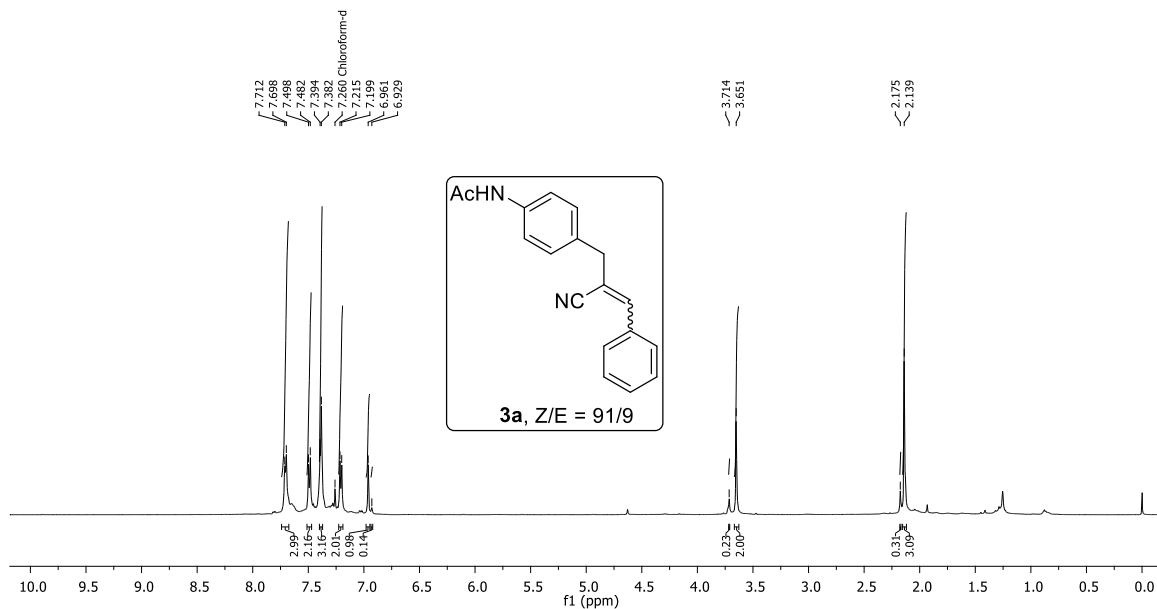

$^{13}\text{C}\{^1\text{H}\}$  NMR,  $\text{CDCl}_3$ , 126 MHz

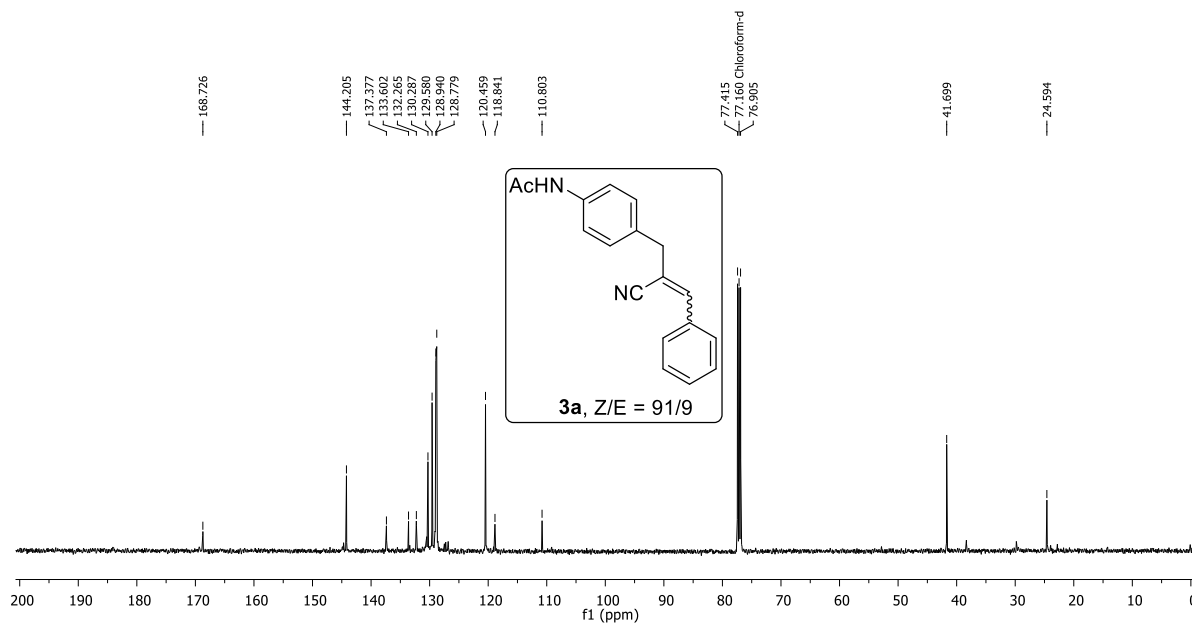

***N*-(4-(2-Cyano-3-(*p*-tolyl)allyl)phenyl)acetamide (**3b**):**

**<sup>1</sup>H NMR, CDCl<sub>3</sub>, 500 MHz**

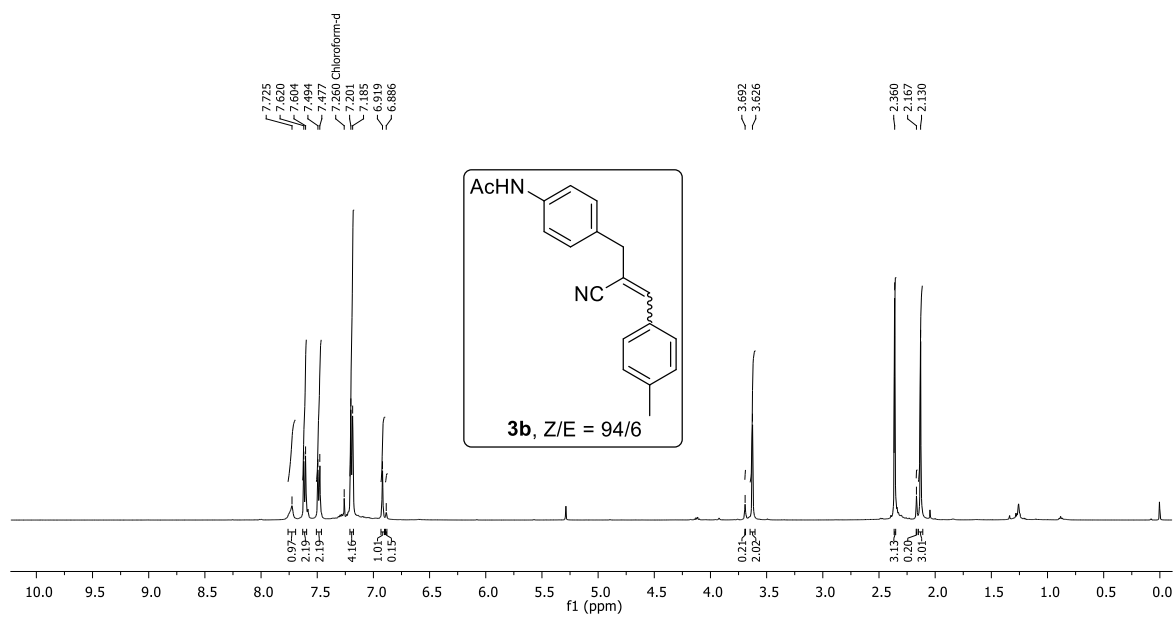

**<sup>13</sup>C{<sup>1</sup>H} NMR, CDCl<sub>3</sub>, 126 MHz**

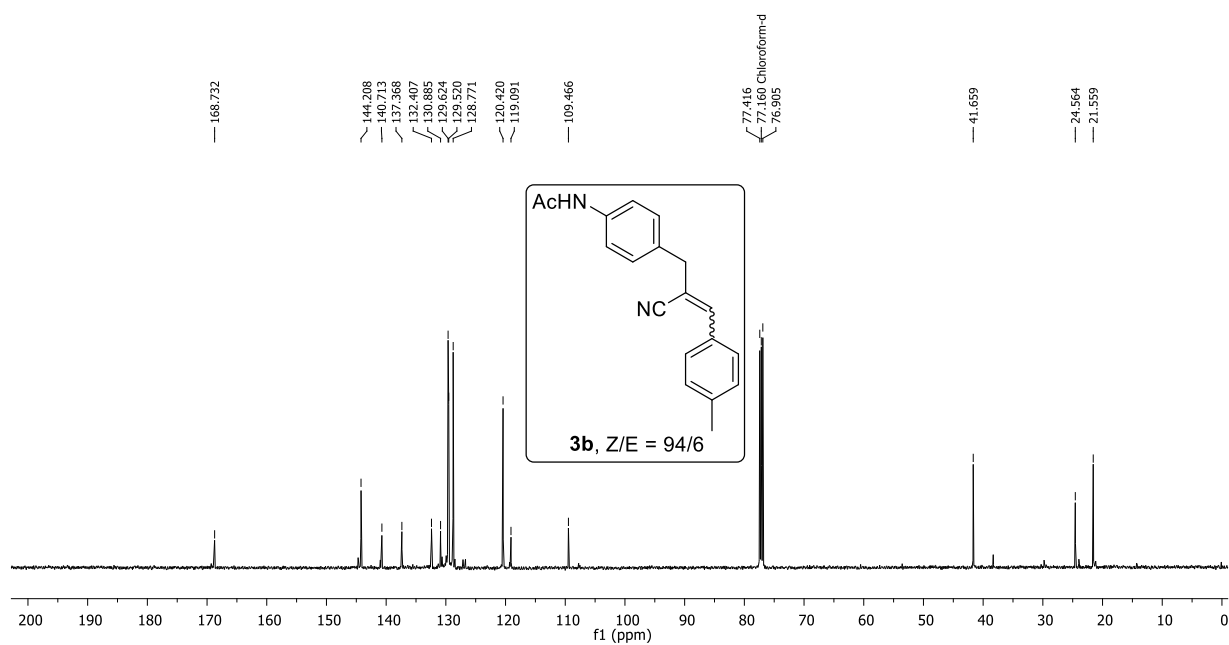

# *N*-(4-(2-Cyano-3-(*o*-tolyl)allyl)phenyl)acetamide (**3c**):

<sup>1</sup>H NMR, CDCl<sub>3</sub>, 500 MHz

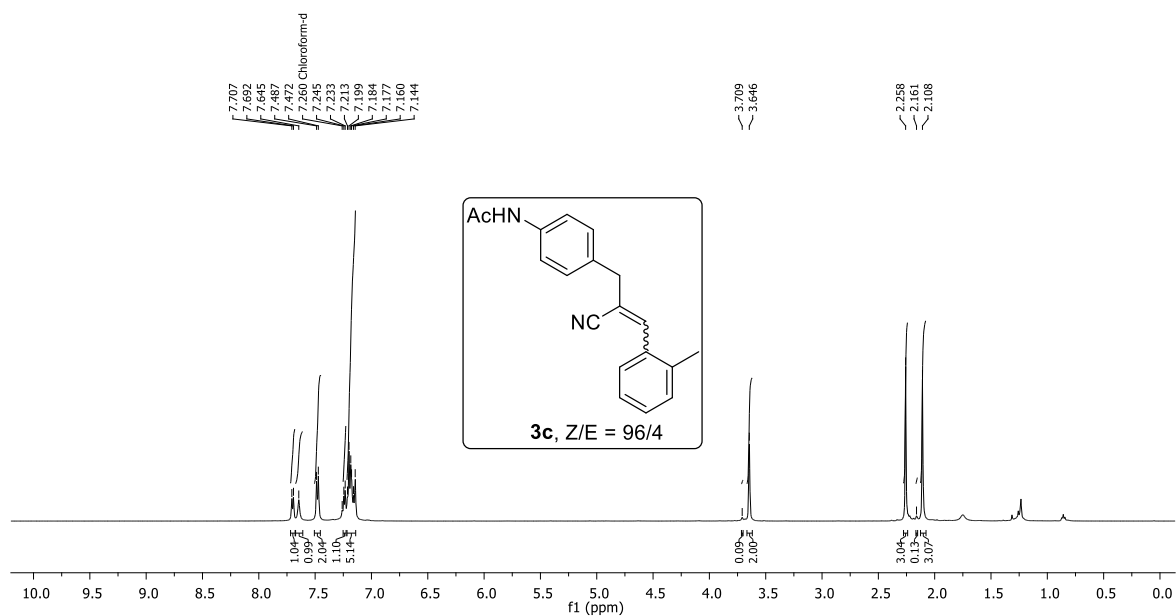

<sup>13</sup>C{<sup>1</sup>H} NMR, CDCl<sub>3</sub>, 126 MHz

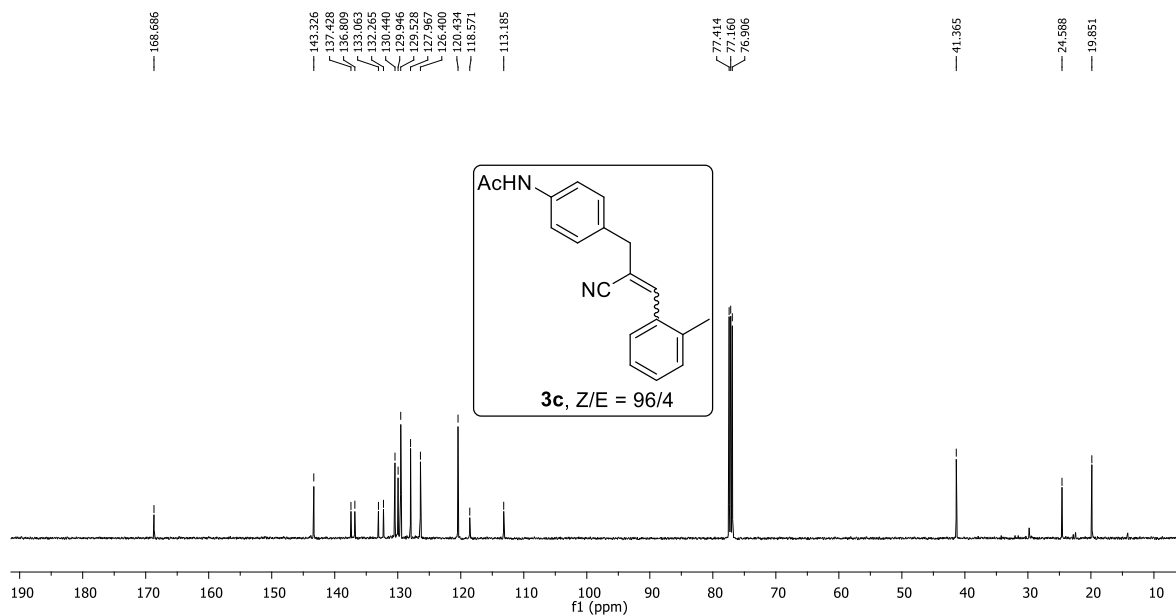

***N*-(4-(2-Cyano-3-(*m*-tolyl)allyl)phenyl)acetamide (3d):  
<sup>1</sup>H NMR, CDCl<sub>3</sub>, 500 MHz**

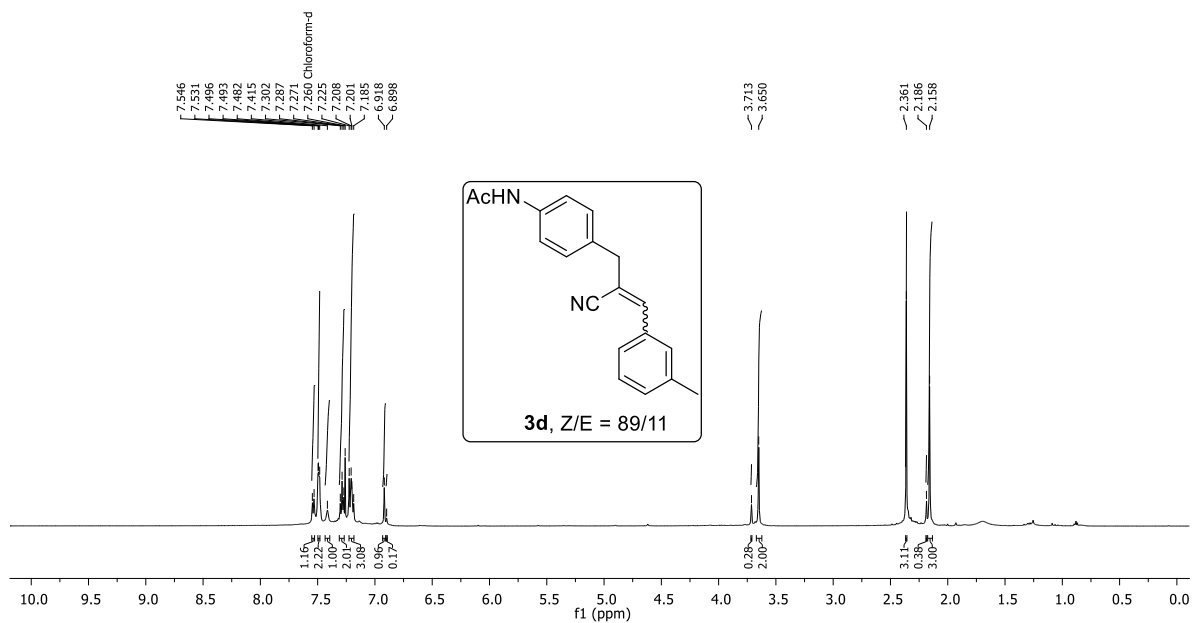

**<sup>13</sup>C{<sup>1</sup>H} NMR, CDCl<sub>3</sub>, 126 MHz**

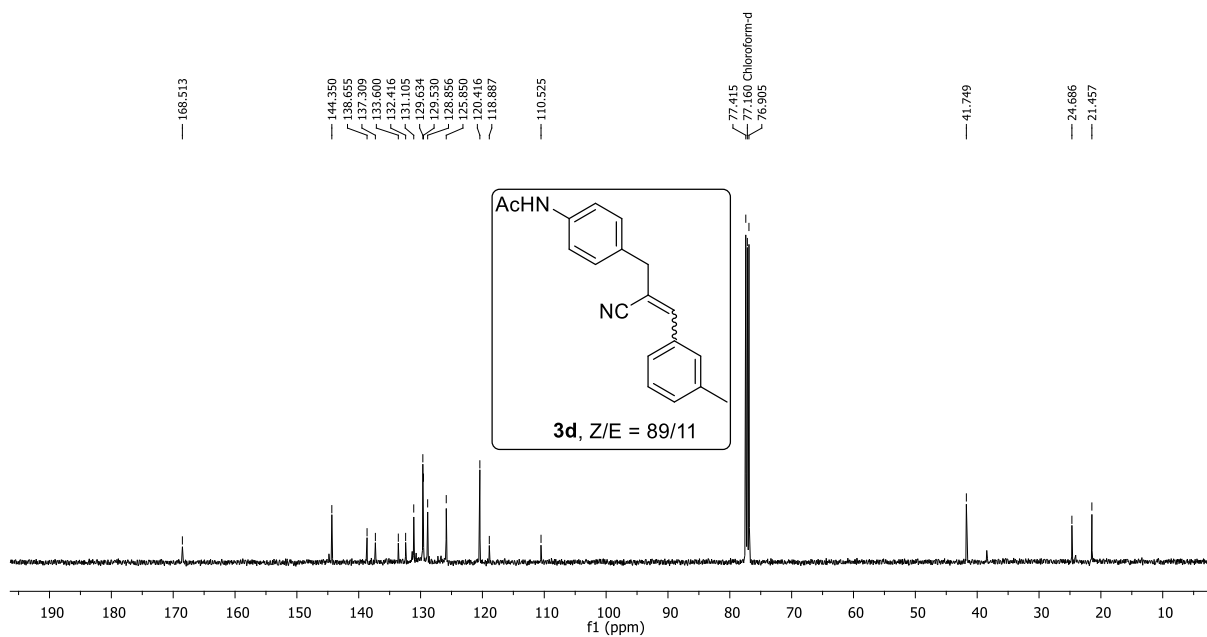

***N*-(4-(3-(4-Chlorophenyl)-2-cyanoallyl)phenyl)acetamide (**3e**):  
<sup>1</sup>H NMR, CDCl<sub>3</sub>, 500 MHz**

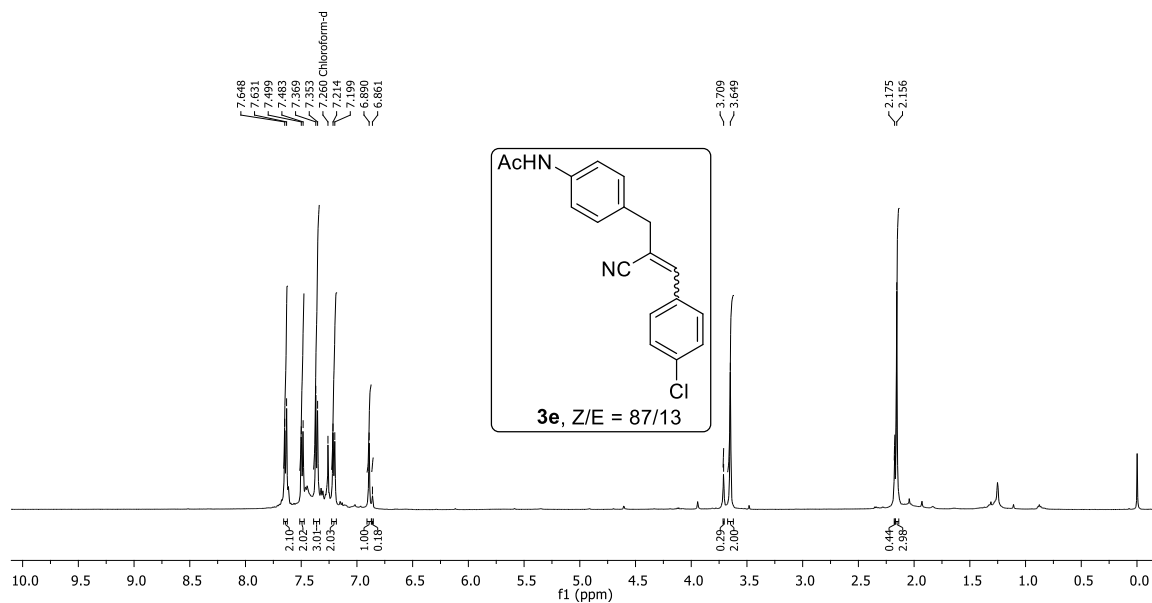

**<sup>13</sup>C{<sup>1</sup>H} NMR, CDCl<sub>3</sub>, 126 MHz**

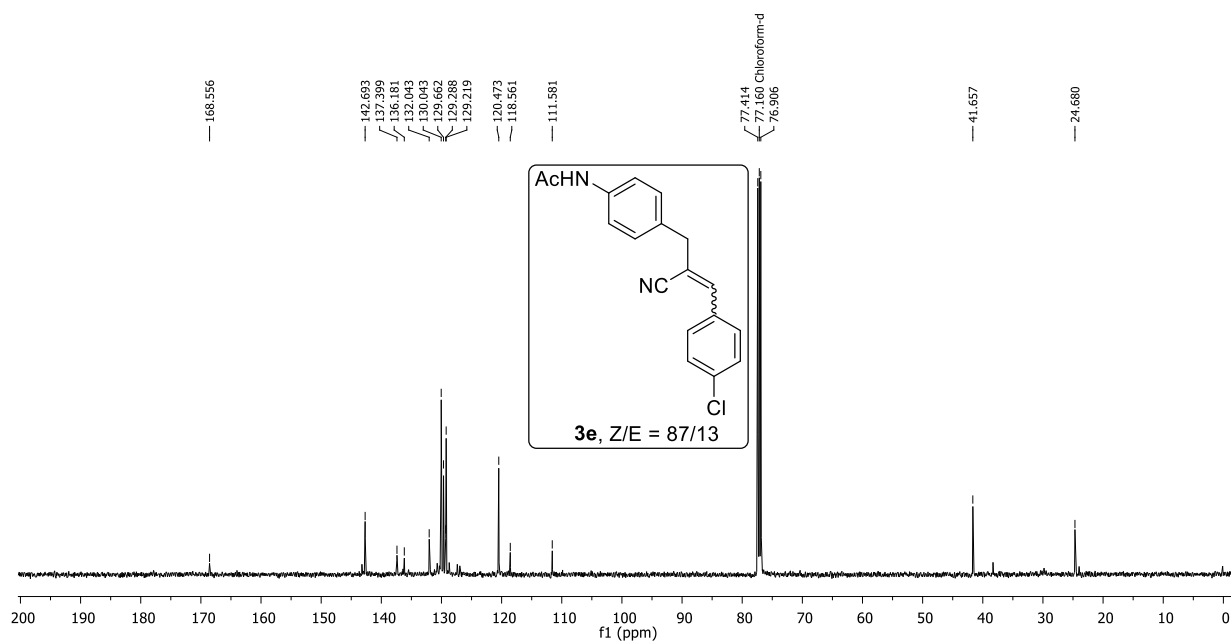

***N*-4-(3-(3-Chlorophenyl)-2-cyanoallyl)phenylacetamide (3f):**

**<sup>1</sup>H NMR, CDCl<sub>3</sub>, 500 MHz**

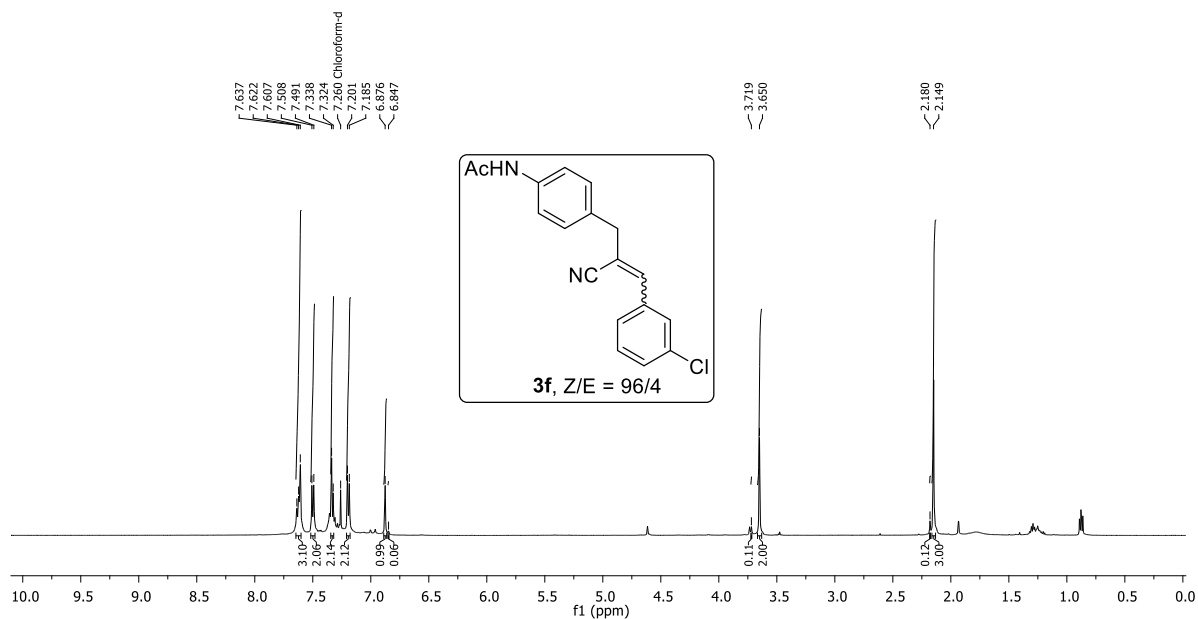

**<sup>13</sup>C{<sup>1</sup>H} NMR, CDCl<sub>3</sub>, 126 MHz**

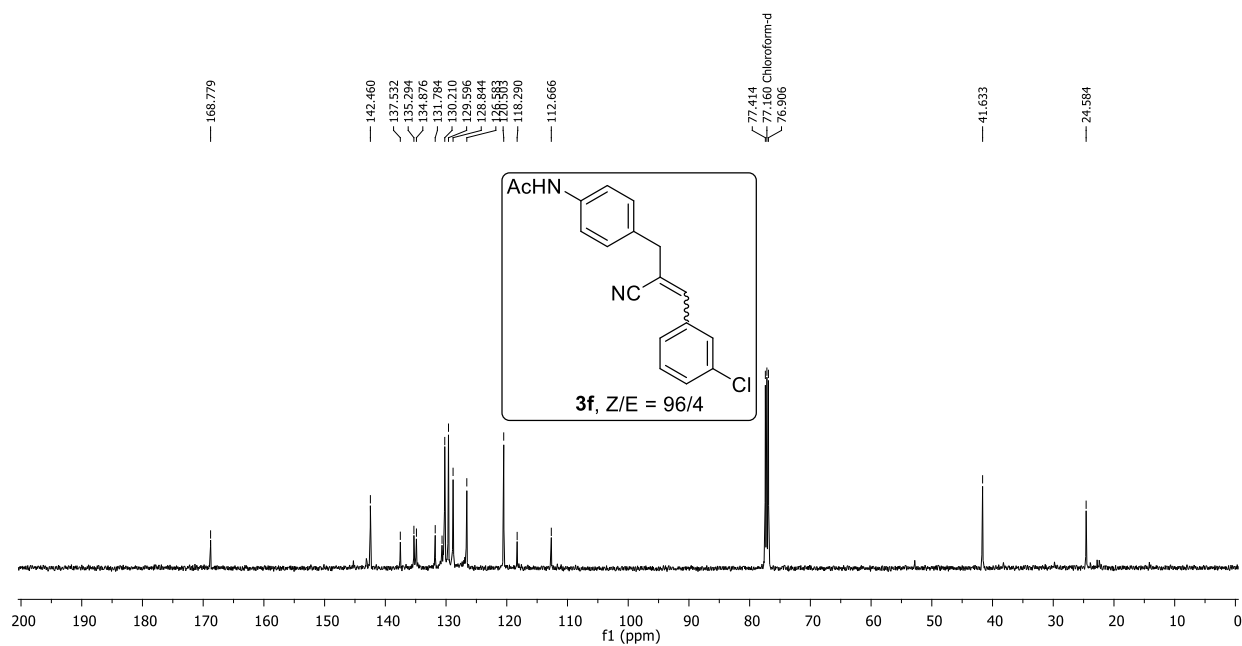



***N*-(4-(3-(2-Chlorophenyl)-2-cyanoallyl)phenyl)acetamide (3g):  
<sup>1</sup>H NMR, CDCl<sub>3</sub>, 500 MHz**

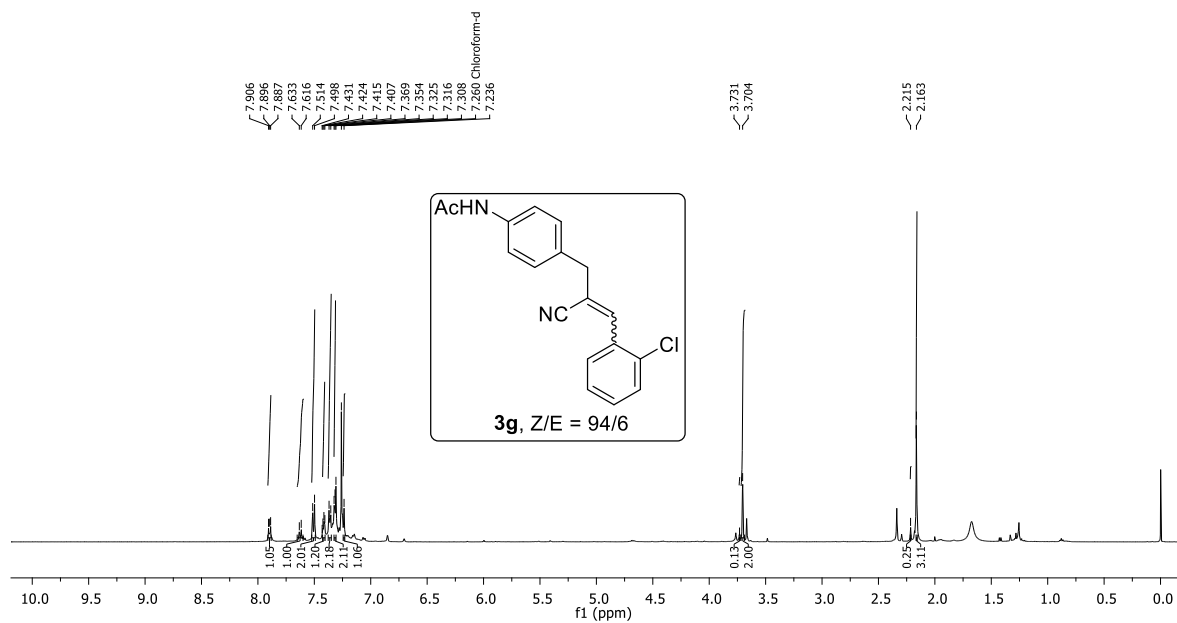

**<sup>13</sup>C{<sup>1</sup>H} NMR, CDCl<sub>3</sub>, 126 MHz**

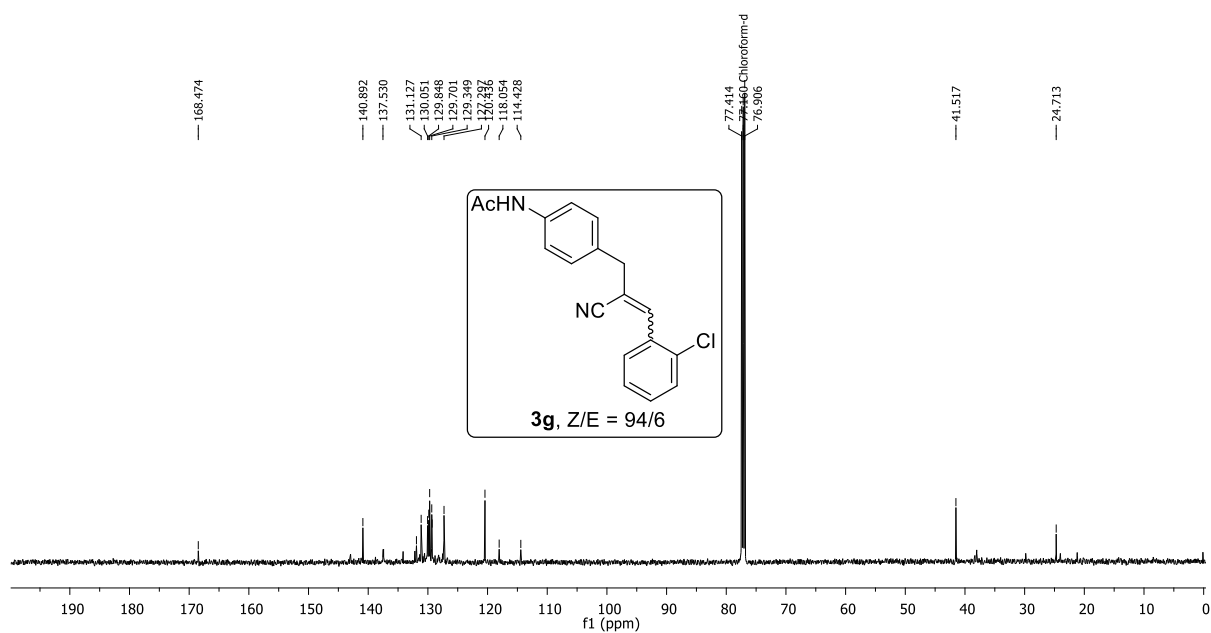

### *N*-(4-(3-(4-Bromophenyl)-2-cyanoallyl)phenyl)acetamide (**3h**):

<sup>1</sup>H NMR, CDCl<sub>3</sub>, 500 MHz

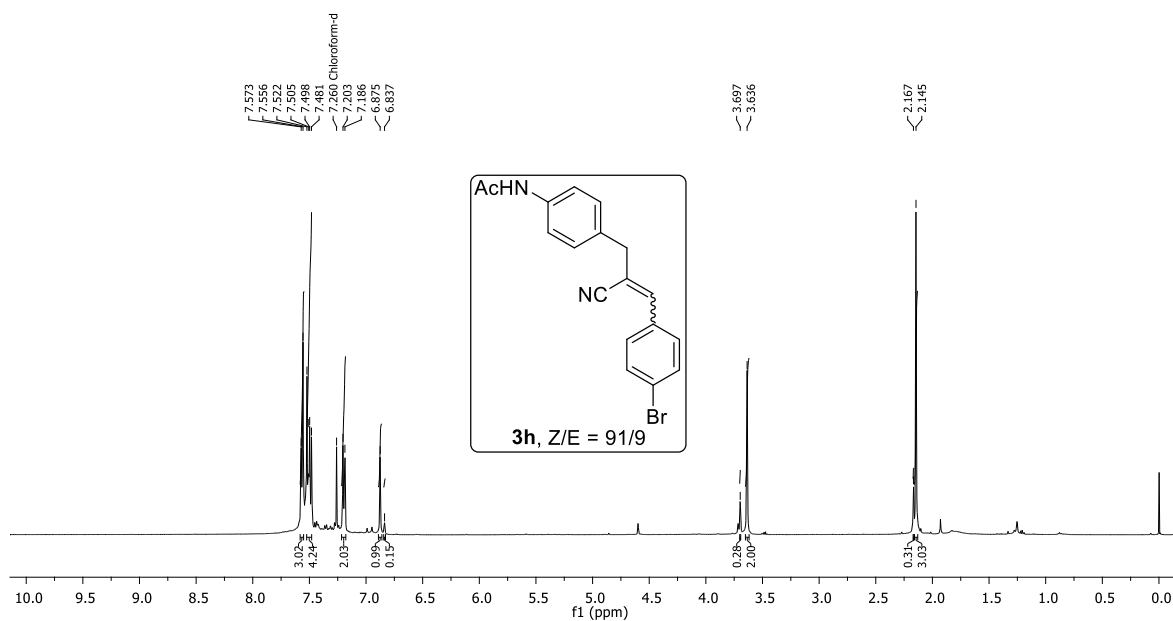

<sup>13</sup>C{<sup>1</sup>H} NMR, CDCl<sub>3</sub>, 126 MHz

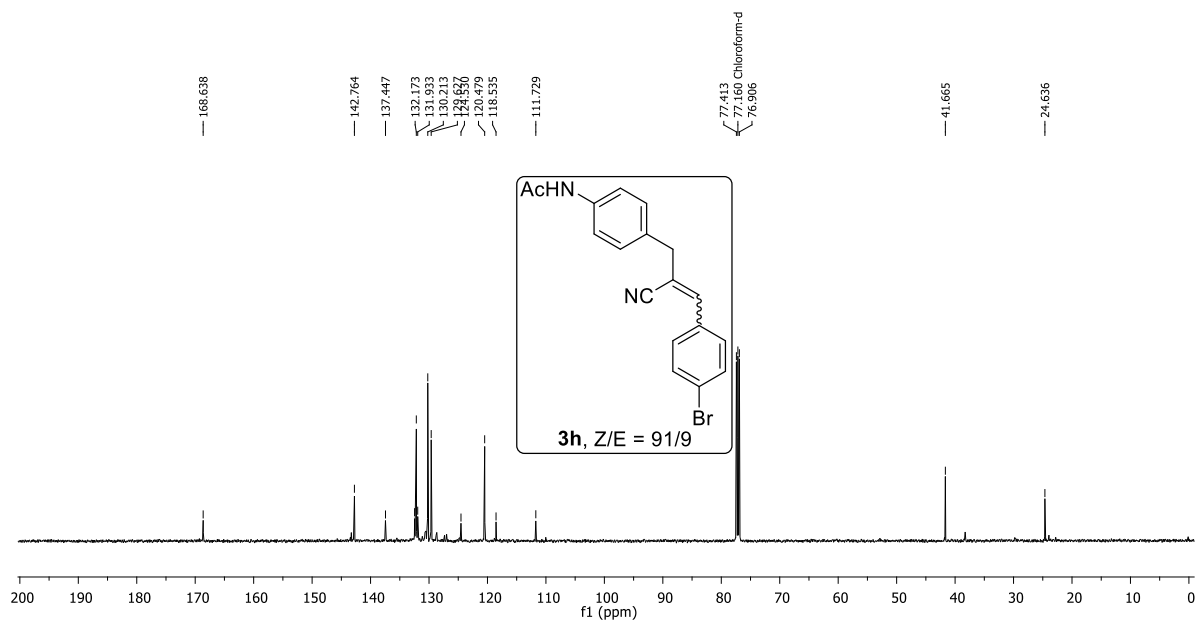

***N*-4-(3-(3-Bromophenyl)-2-cyanoallyl)phenylacetamide (**3i**):**

**<sup>1</sup>H NMR, CDCl<sub>3</sub>, 500 MHz**

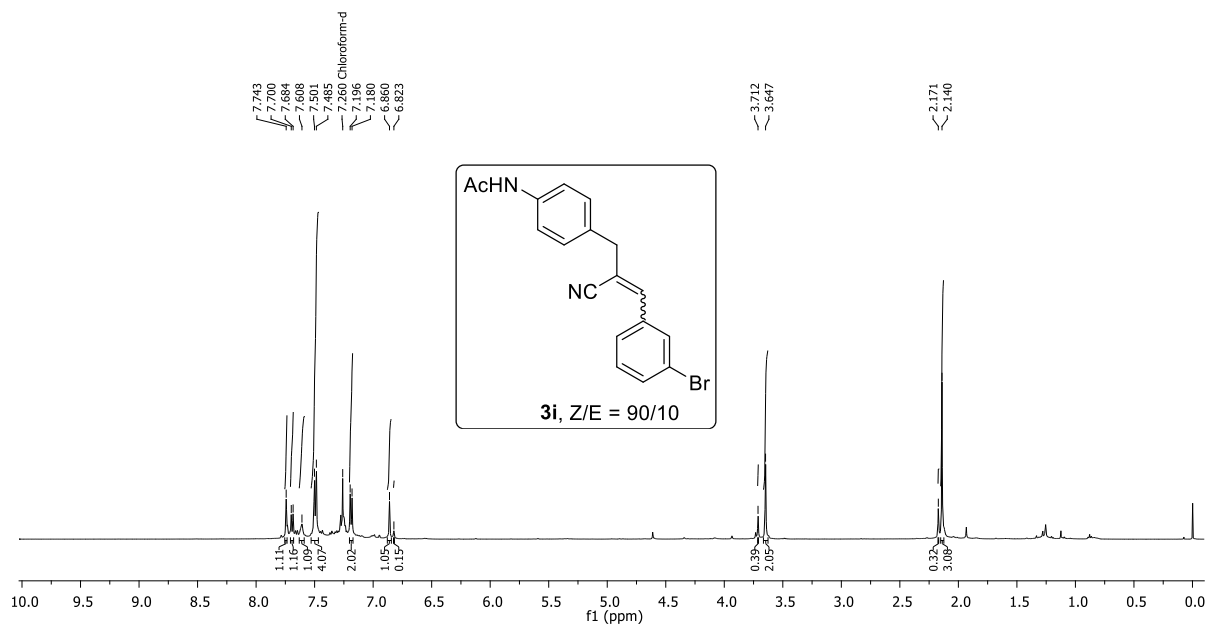

**<sup>13</sup>C{<sup>1</sup>H} NMR, CDCl<sub>3</sub>, 126 MHz**

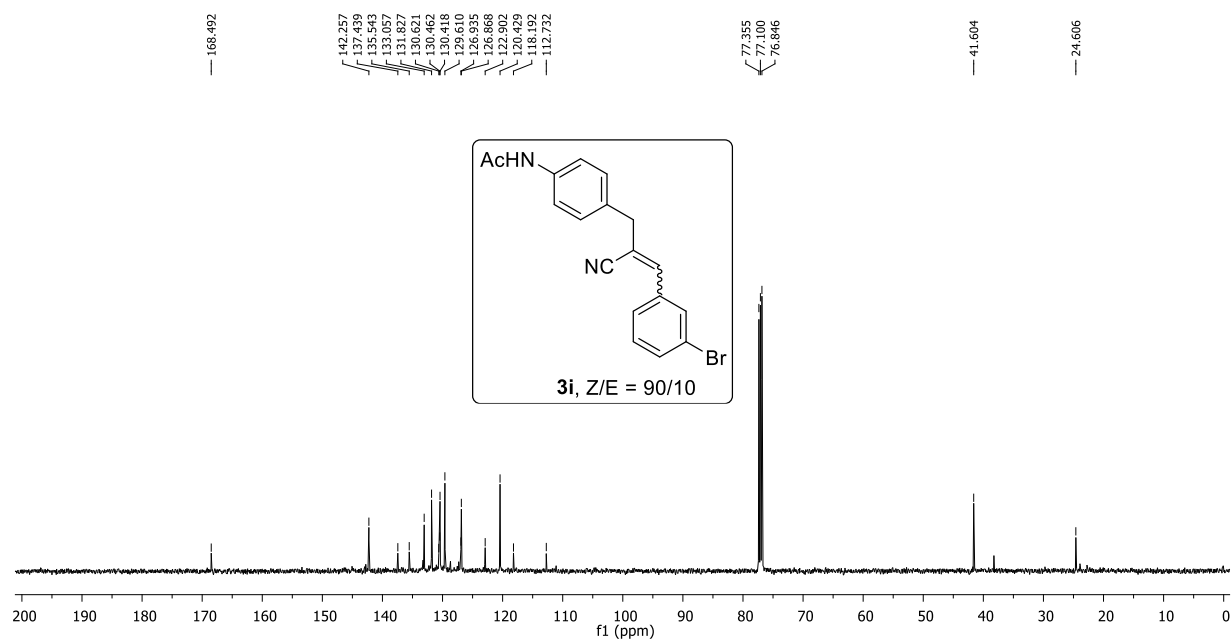

***N*-[4-(2-Cyano-3-(4-fluorophenyl)allyl)phenyl]acetamide (**3j**):  
<sup>1</sup>H NMR, CDCl<sub>3</sub>, 500 MHz**

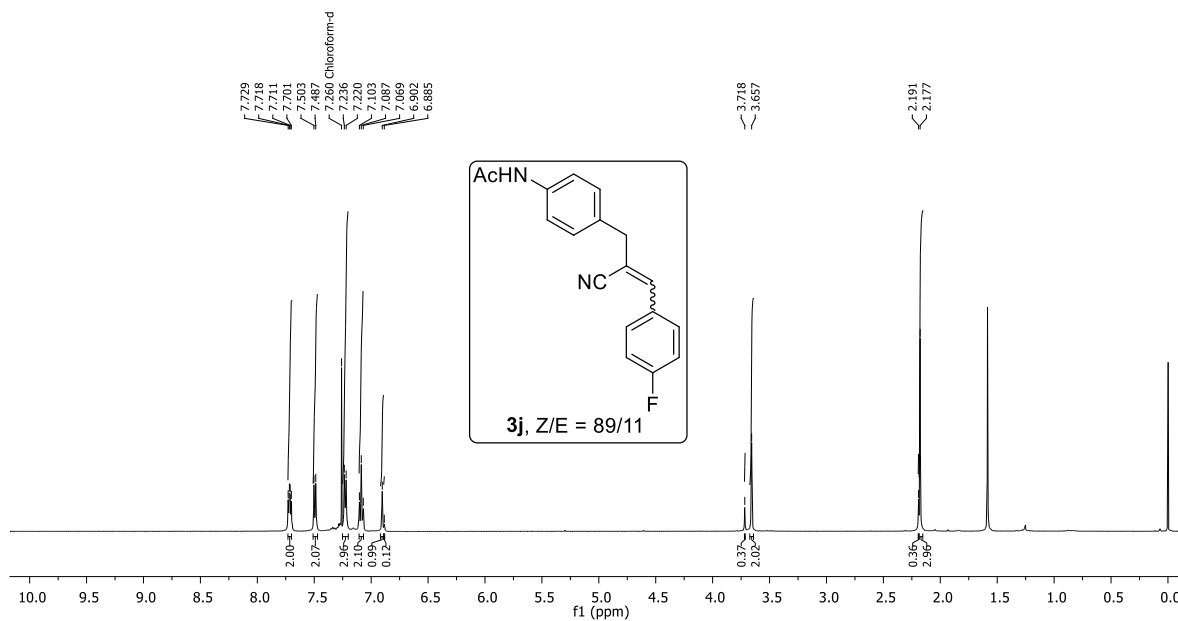

**<sup>13</sup>C{<sup>1</sup>H} NMR, CDCl<sub>3</sub>, 126 MHz**

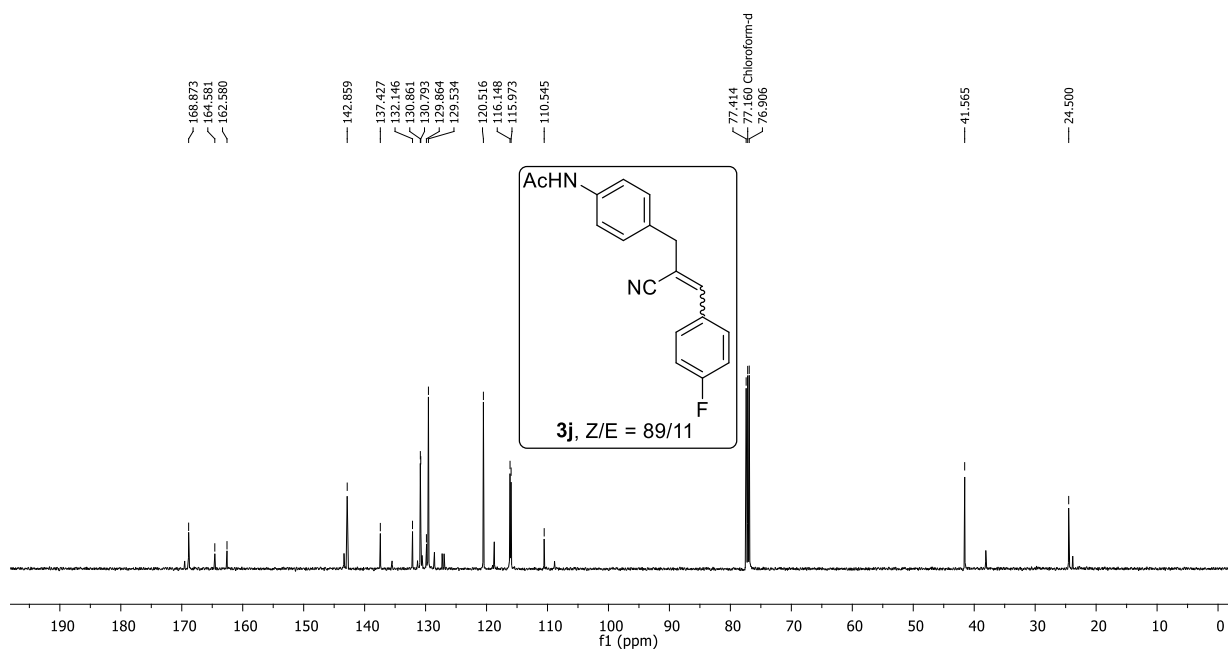

**<sup>19</sup>F NMR, CDCl<sub>3</sub>, 471 MHz**

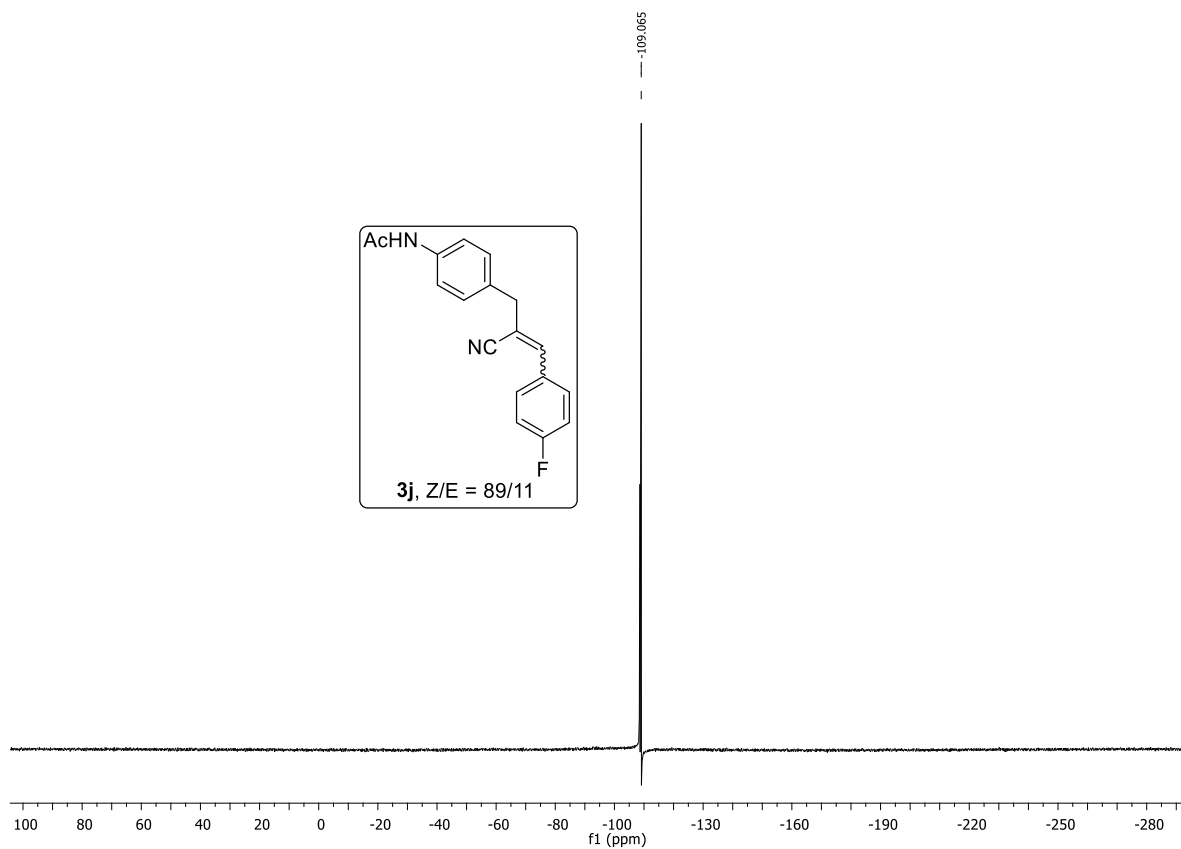

***N*-(4-(2-Cyano-3-(3-fluorophenyl)allyl)phenyl)acetamide (4k):  
<sup>1</sup>H NMR, CDCl<sub>3</sub>, 500 MHz**

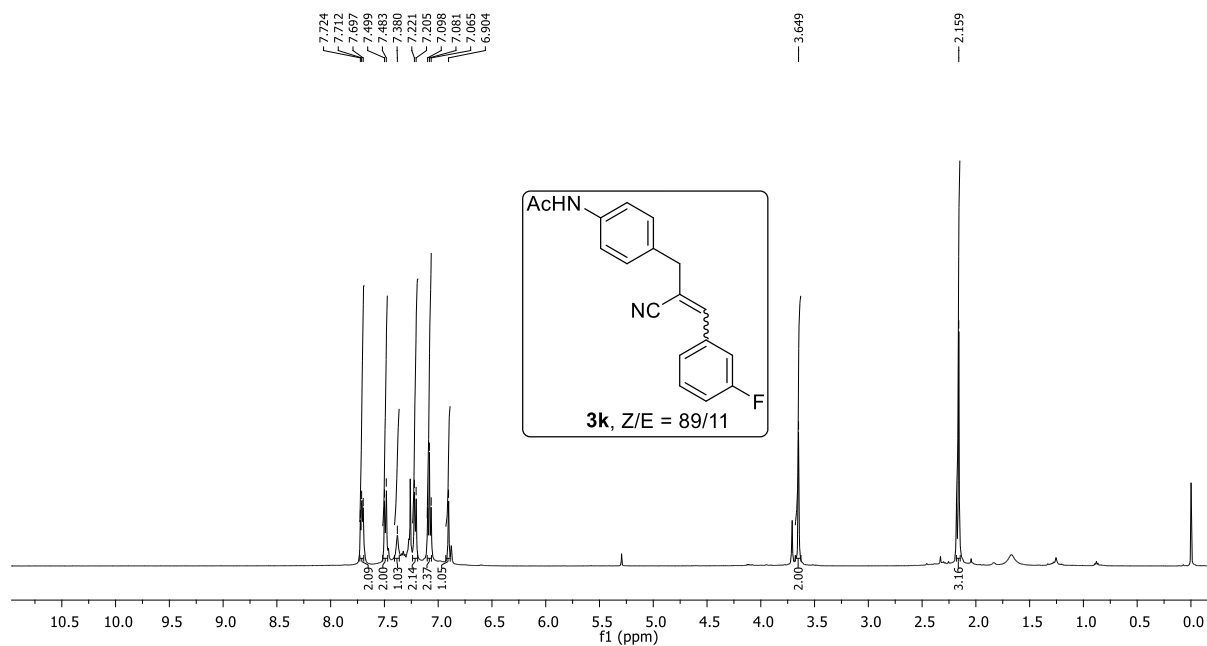

**<sup>13</sup>C{<sup>1</sup>H} NMR, CDCl<sub>3</sub>, 126 MHz**

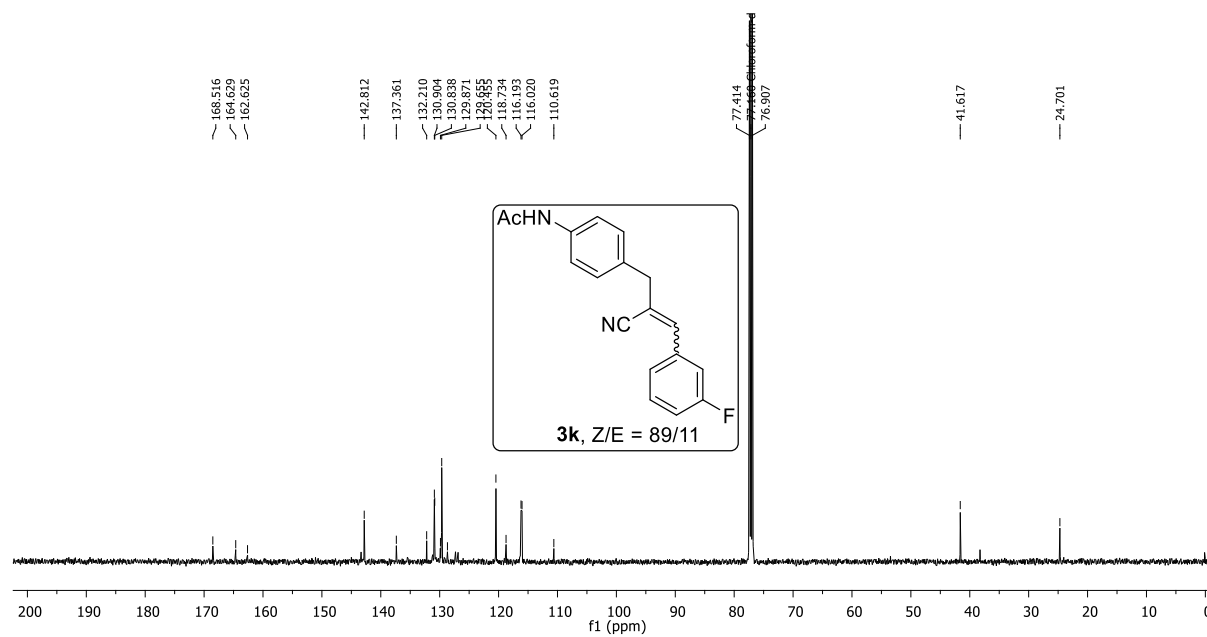

$^{19}\text{F}$  NMR,  $\text{CDCl}_3$ , 471 MHz

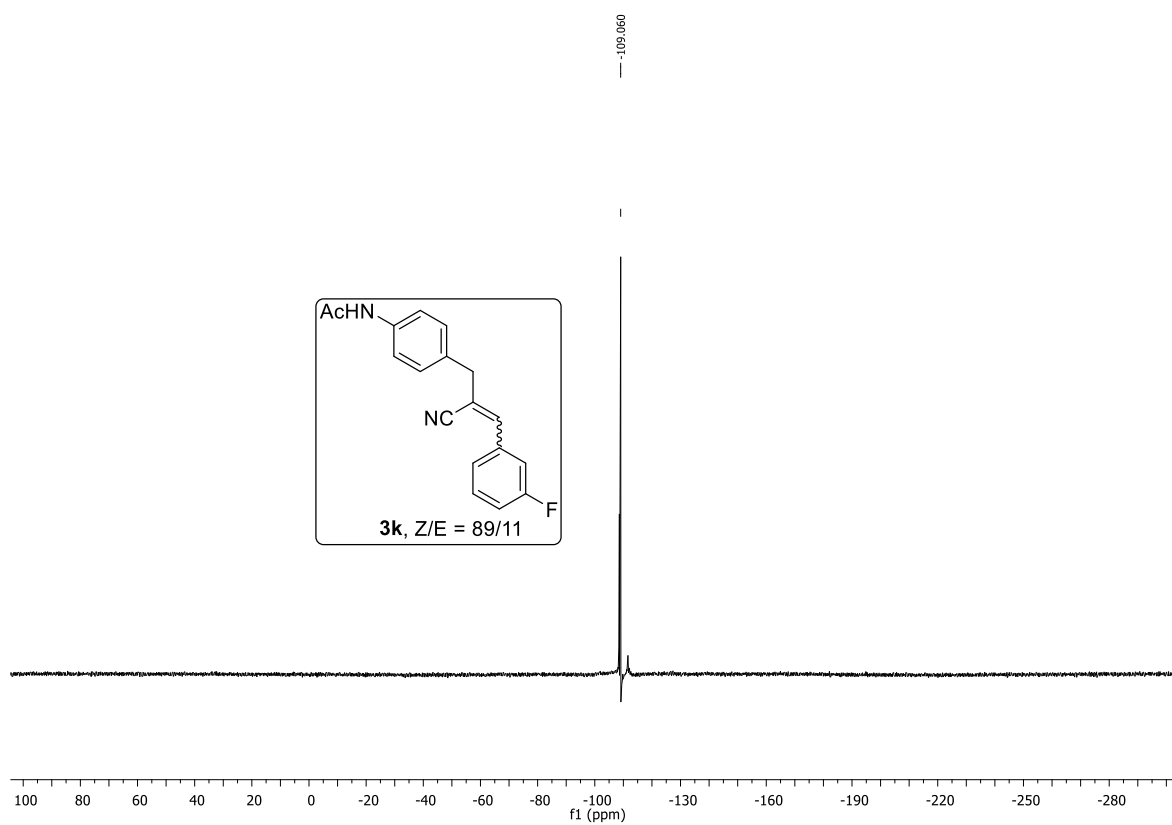

***N*-[4-(2-Cyano-3-(4-nitrophenyl)allyl)phenyl]acetamide (**3I**):  
<sup>1</sup>H NMR, CDCl<sub>3</sub>, 500 MHz**

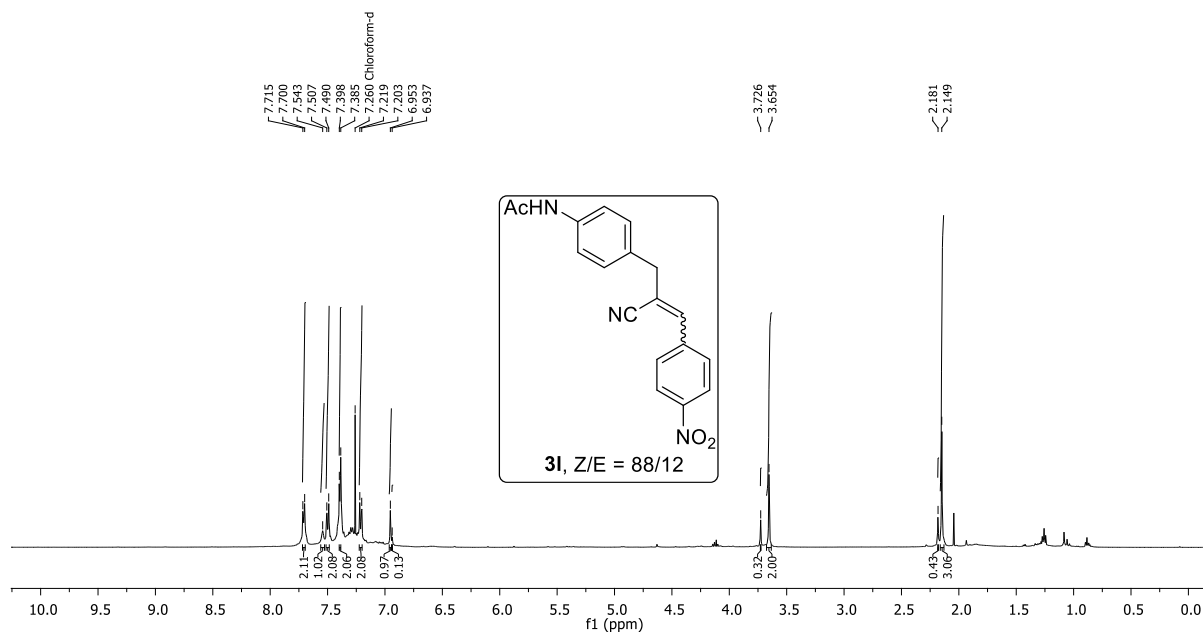

**<sup>13</sup>C{<sup>1</sup>H}NMR, CDCl<sub>3</sub>, 126 MHz**

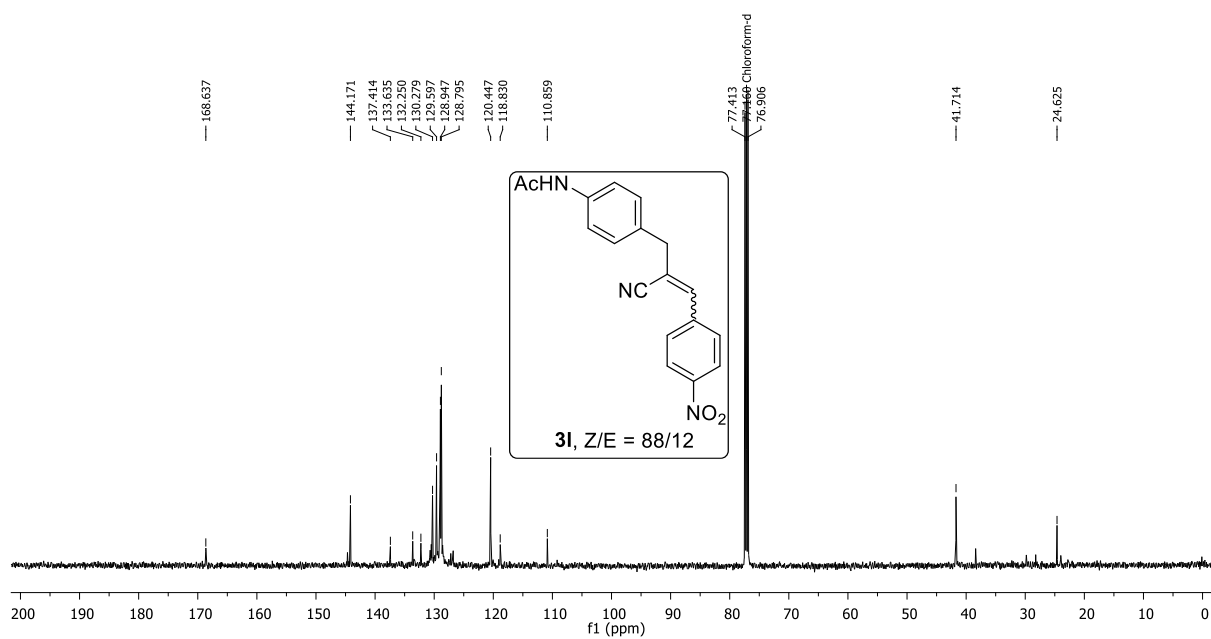



***N*-(4-(3-([1,1'-Biphenyl]-4-yl)-2-cyanoallyl)phenyl)acetamide (3m):  
<sup>1</sup>H NMR, DMSO-d<sub>6</sub>, 500 MHz**

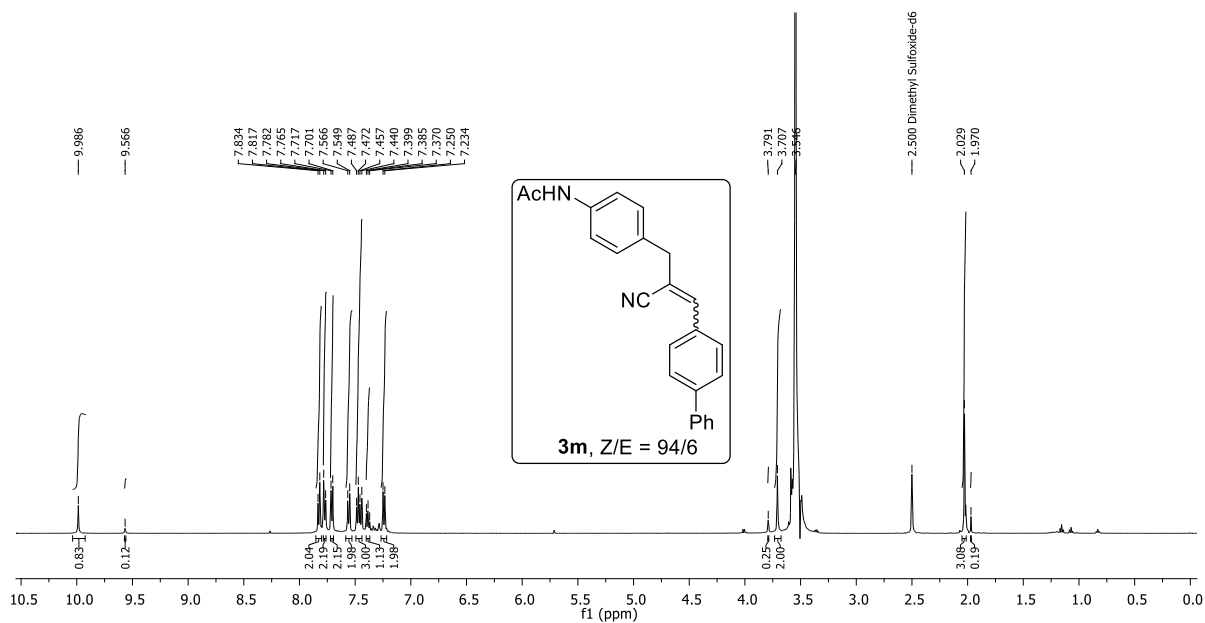

**<sup>13</sup>C{<sup>1</sup>H} NMR, DMSO-d<sub>6</sub>, 126 MHz**

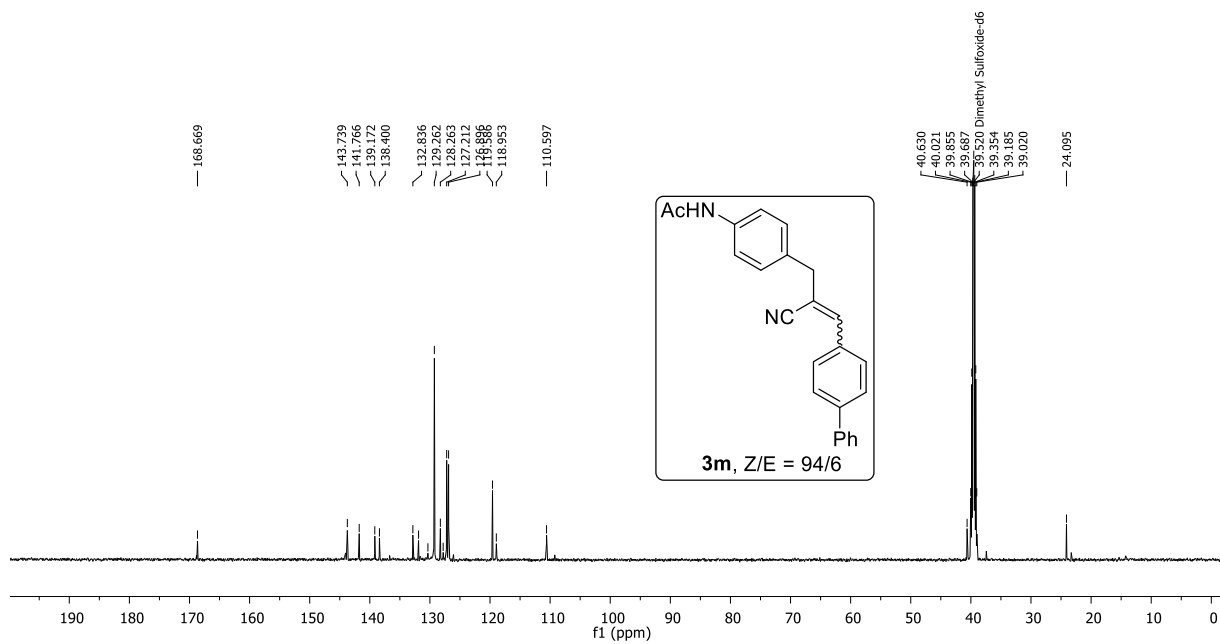

***N*-4-(2-Cyano-3-(naphthalen-1-yl)allyl)phenylacetamide (**3n**):  
<sup>1</sup>H NMR, CDCl<sub>3</sub>, 500 MHz**

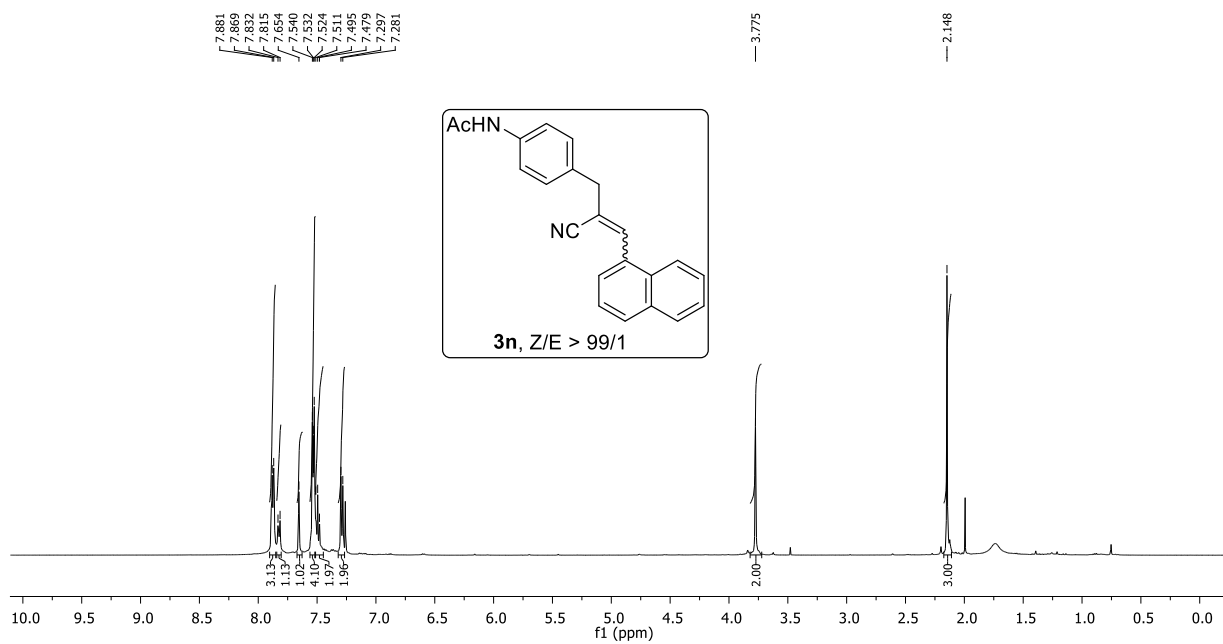

**<sup>13</sup>C{<sup>1</sup>H} NMR, CDCl<sub>3</sub>, 126 MHz**

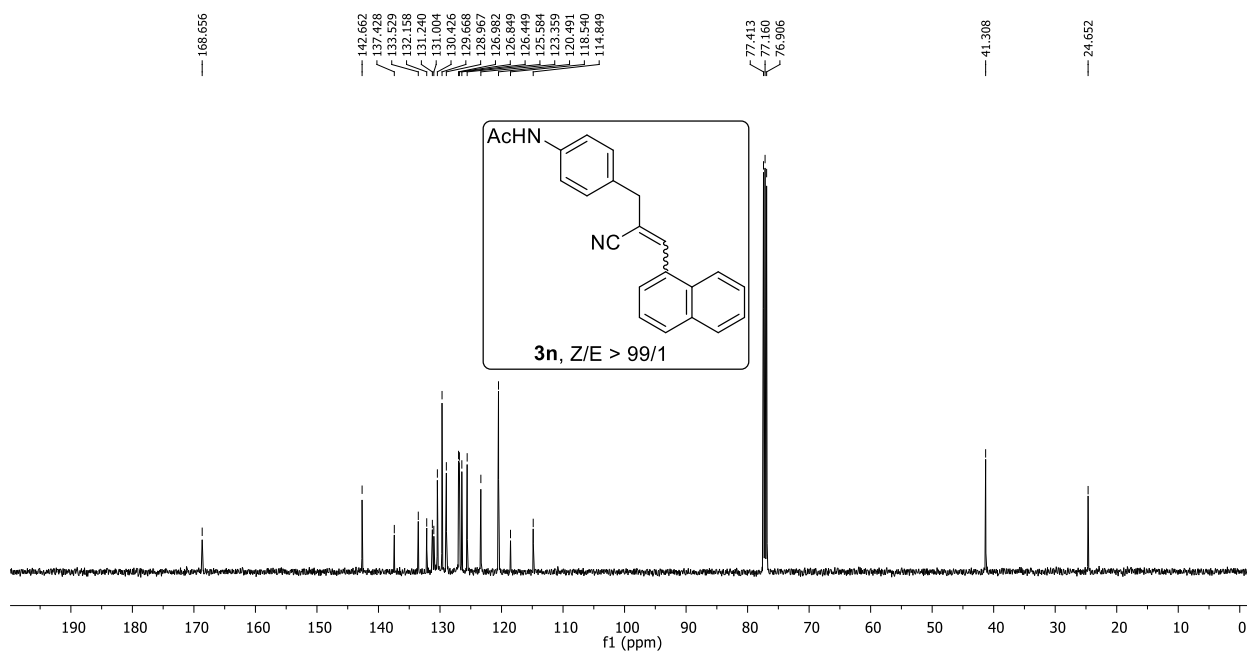

# *N*-(4-(2-Cyano-3-(thiophen-2-yl)allyl)phenyl)acetamide (**3o**):

<sup>1</sup>H NMR, CDCl<sub>3</sub>, 500 MHz

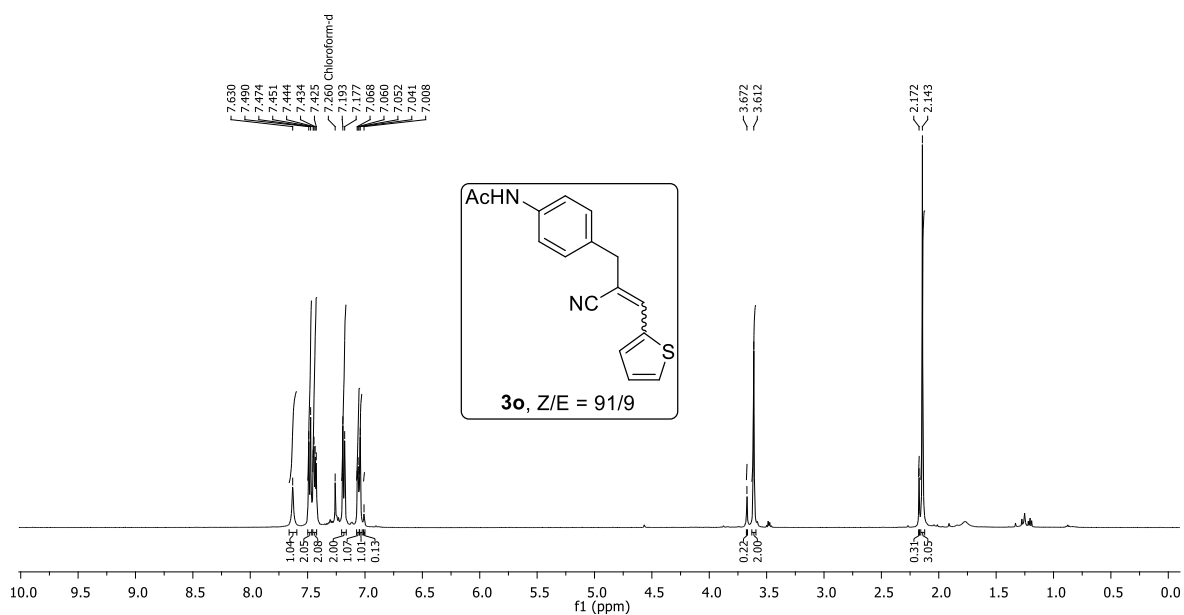

<sup>13</sup>C{<sup>1</sup>H} NMR, CDCl<sub>3</sub>, 126 MHz

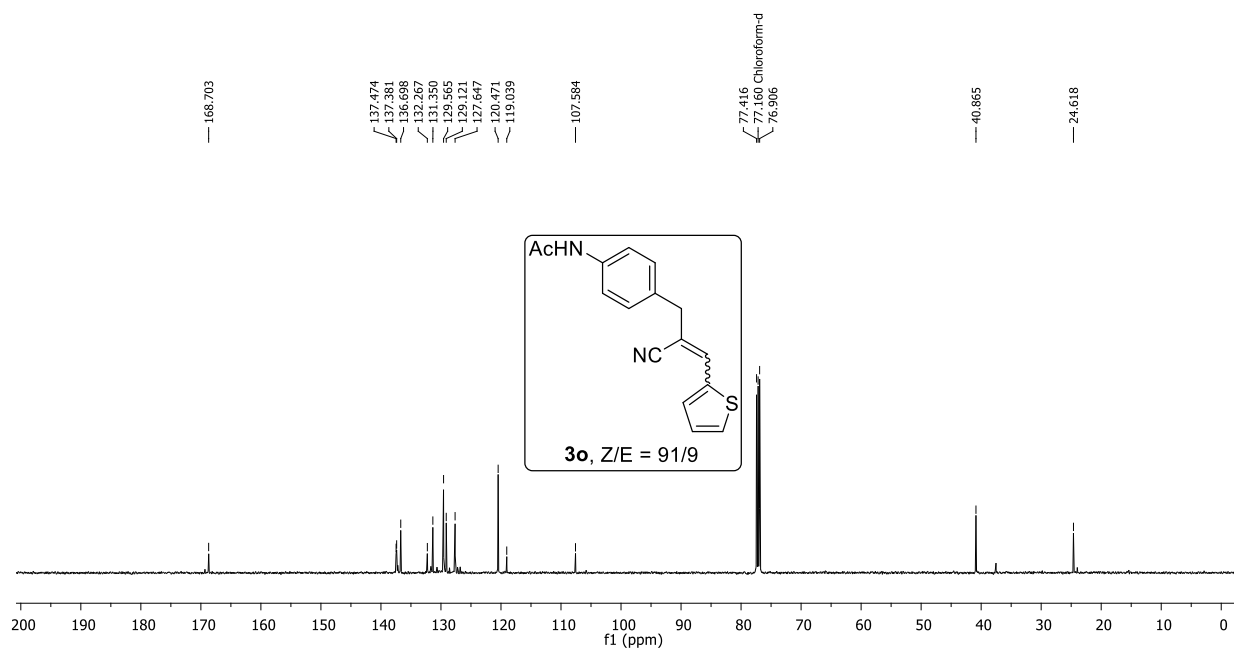

***N*-(4-(2-Cyano-3-phenylallyl)-3-methylphenyl)acetamide (**3p**):  
<sup>1</sup>H NMR, CDCl<sub>3</sub>, 500 MHz**

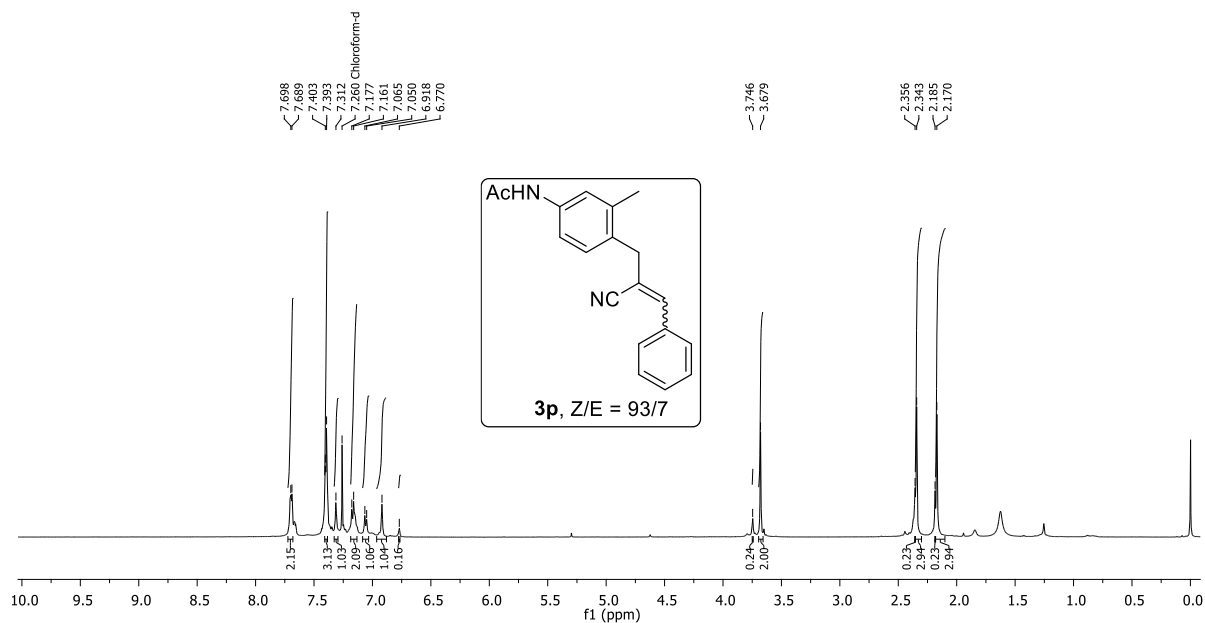

**<sup>13</sup>C{<sup>1</sup>H} NMR, CDCl<sub>3</sub>, 126 MHz**

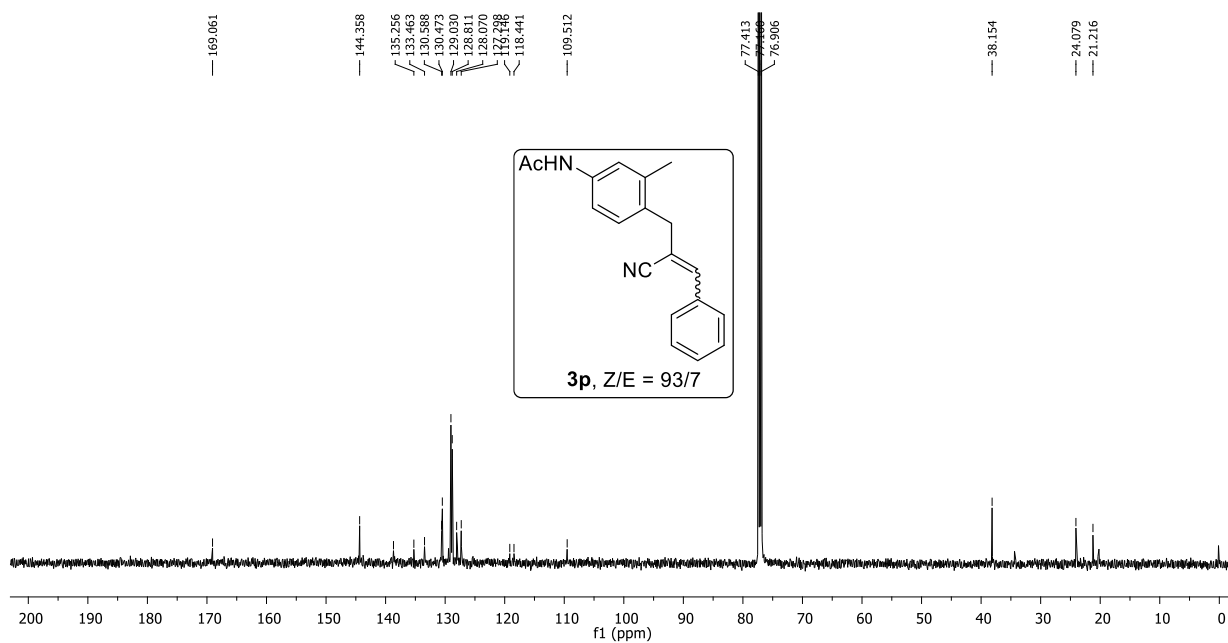

***N*-(4-(3-(4-Chlorophenyl)-2-cyanoallyl)-3-methylphenyl)acetamide (3q):  
<sup>1</sup>H NMR, CDCl<sub>3</sub>, 500 MHz**

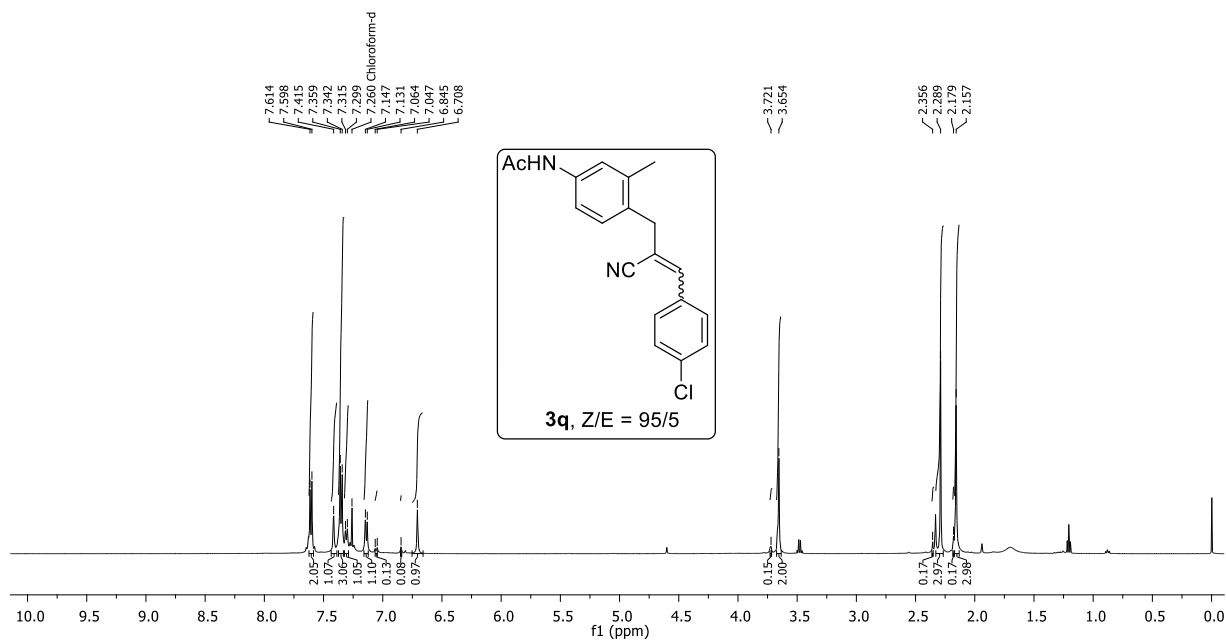

**<sup>13</sup>C{<sup>1</sup>H} NMR, CDCl<sub>3</sub>, 126 MHz**

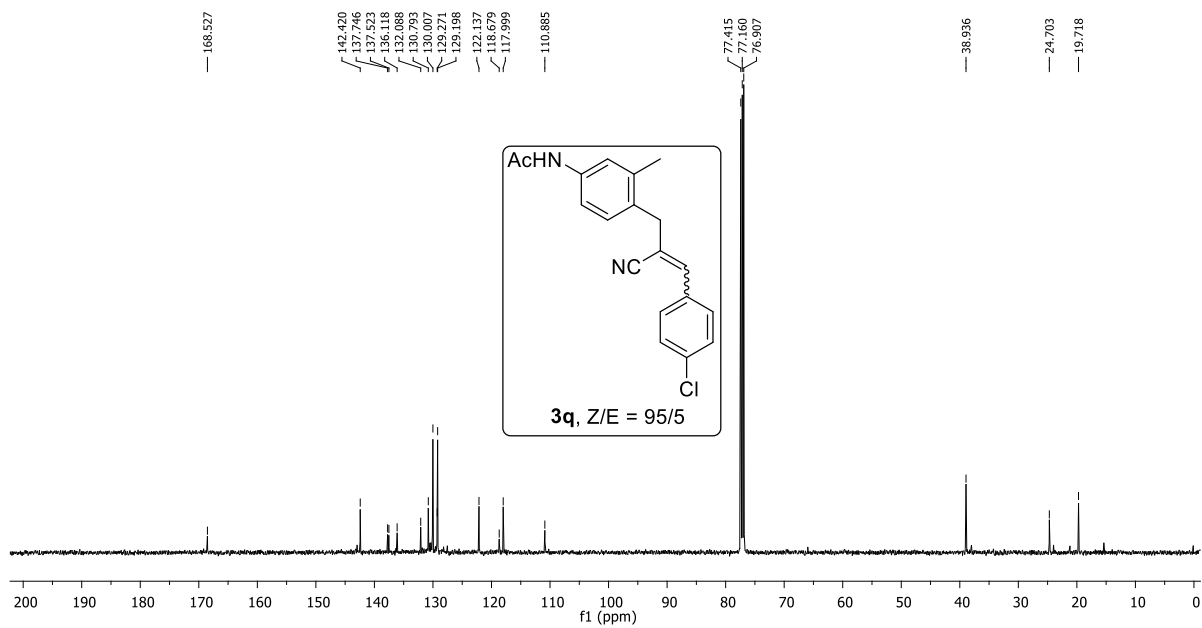

***N*-(4-(2-Cyano-3-phenylallyl)-2-methylphenyl)acetamide (**3r**):**

**<sup>1</sup>H NMR, CDCl<sub>3</sub>, 500 MHz**

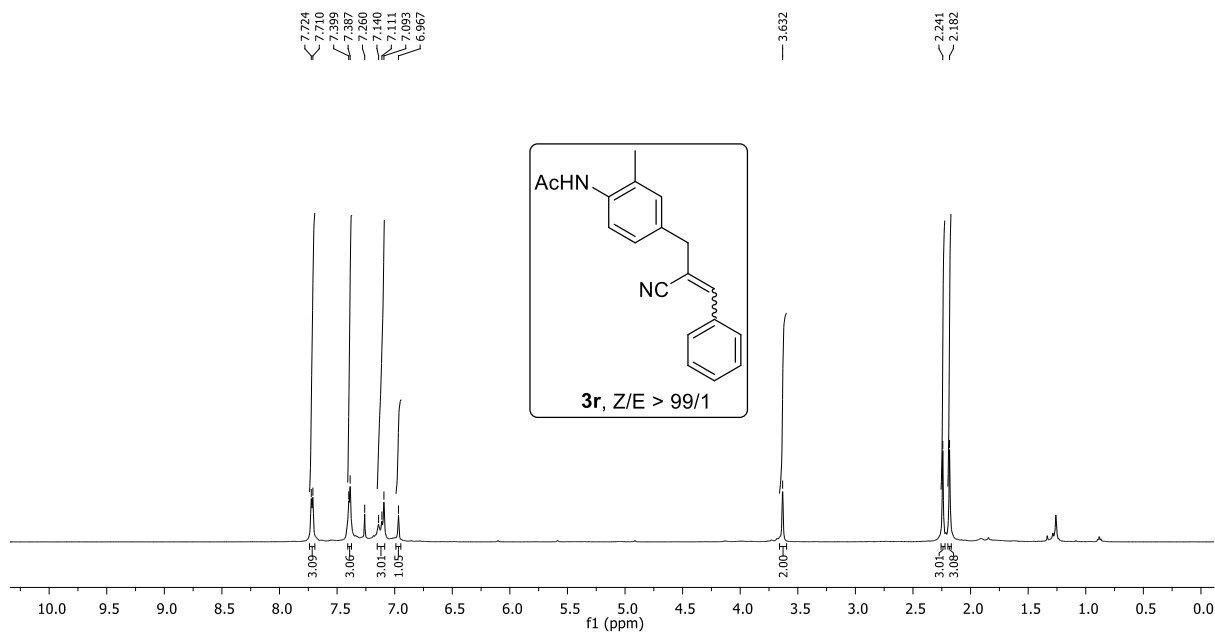

**<sup>13</sup>C{<sup>1</sup>H} NMR, CDCl<sub>3</sub>, 126 MHz**

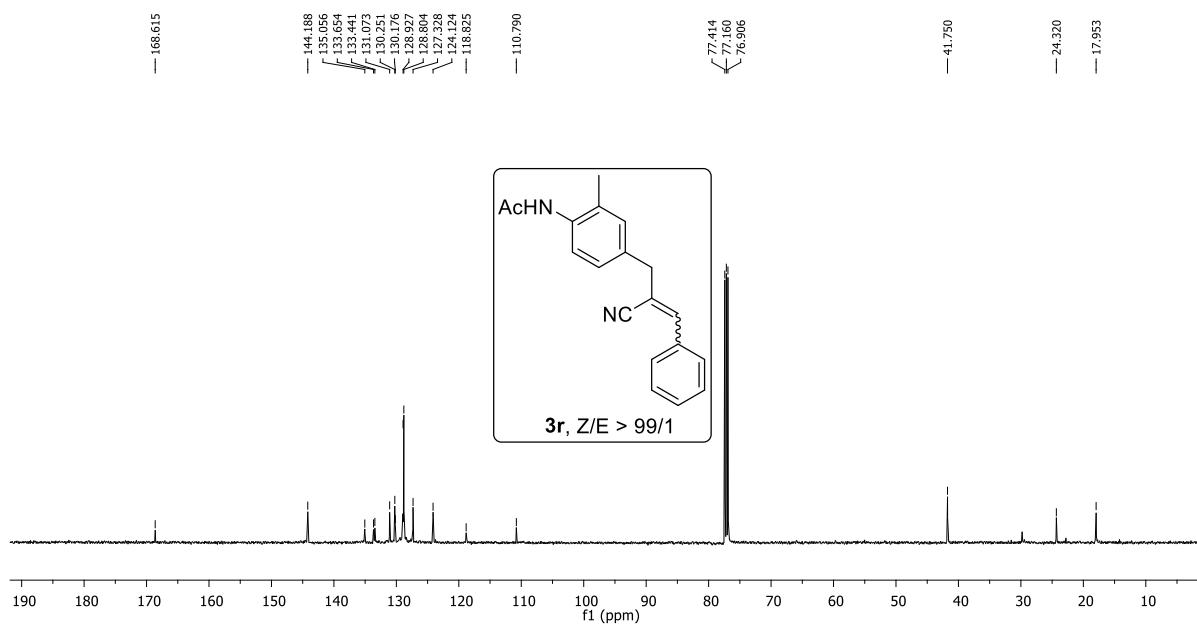

***N*-[4-(3-(4-Chlorophenyl)-2-cyanoallyl)-2-methylphenyl]acetamide (**3s**):  
<sup>1</sup>H NMR, CDCl<sub>3</sub>, 500 MHz**

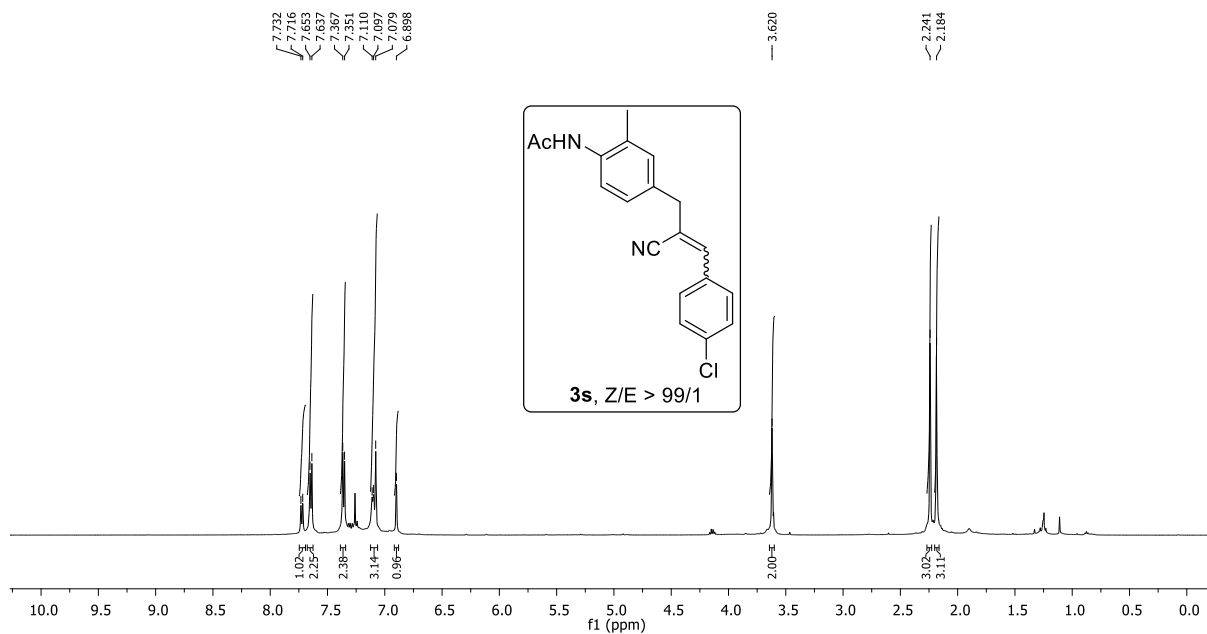

**<sup>13</sup>C{<sup>1</sup>H} NMR, CDCl<sub>3</sub>, 126 MHz**

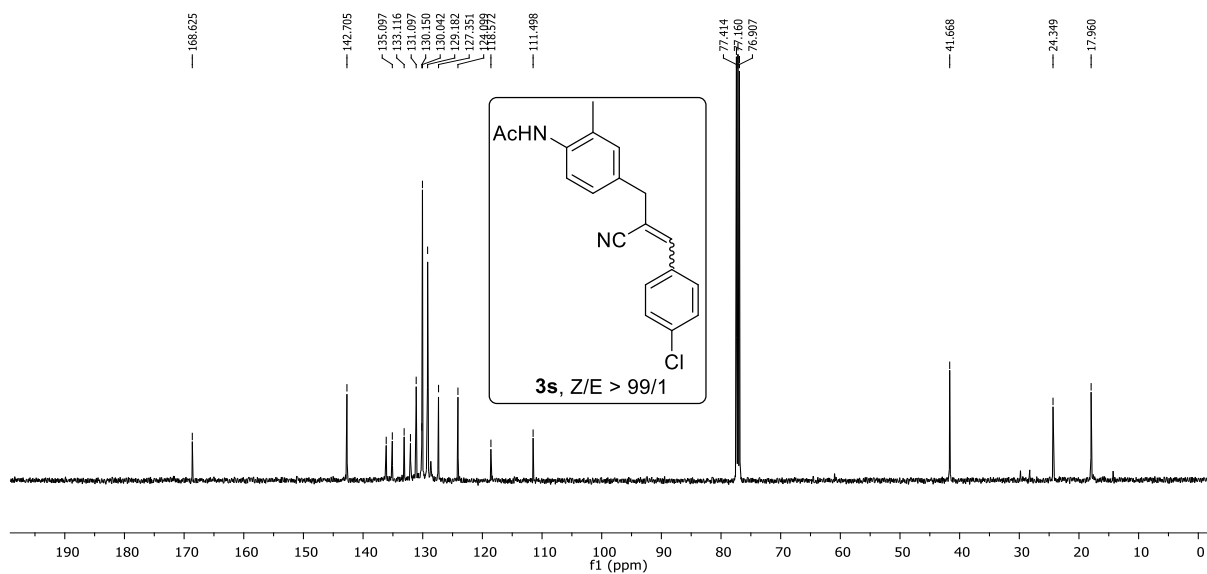





***N*-(3-Chloro-4-(3-(4-chlorophenyl)-2-cyanoallyl)phenyl)acetamide (3u):**

**<sup>1</sup>H NMR, CDCl<sub>3</sub>, 500 MHz**

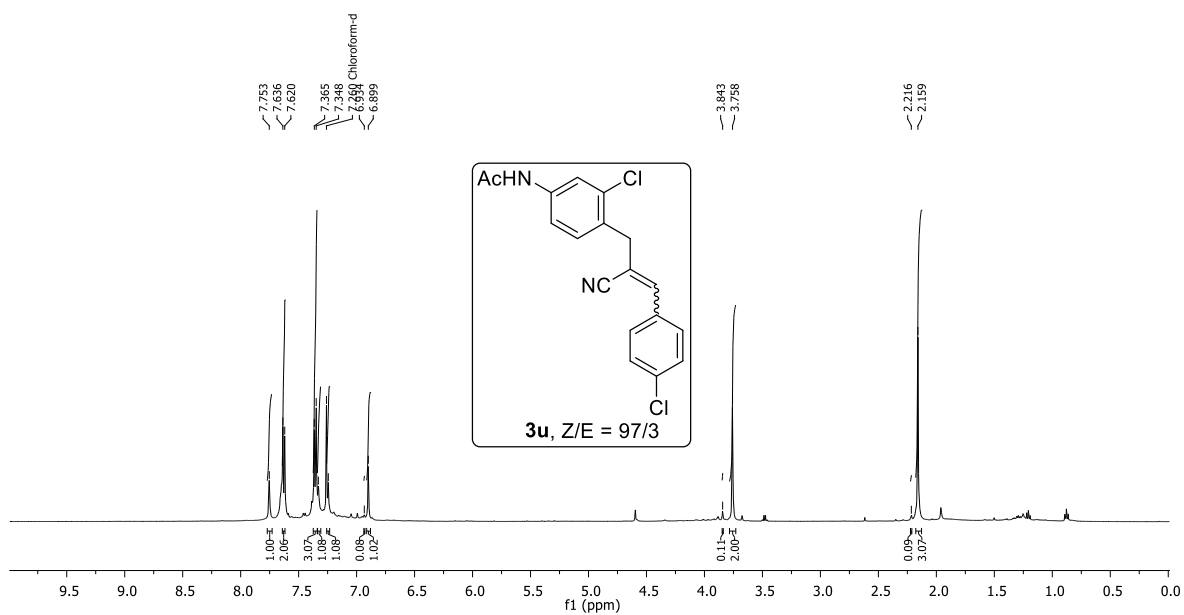

**<sup>13</sup>C{<sup>1</sup>H} NMR, CDCl<sub>3</sub>, 126 MHz**

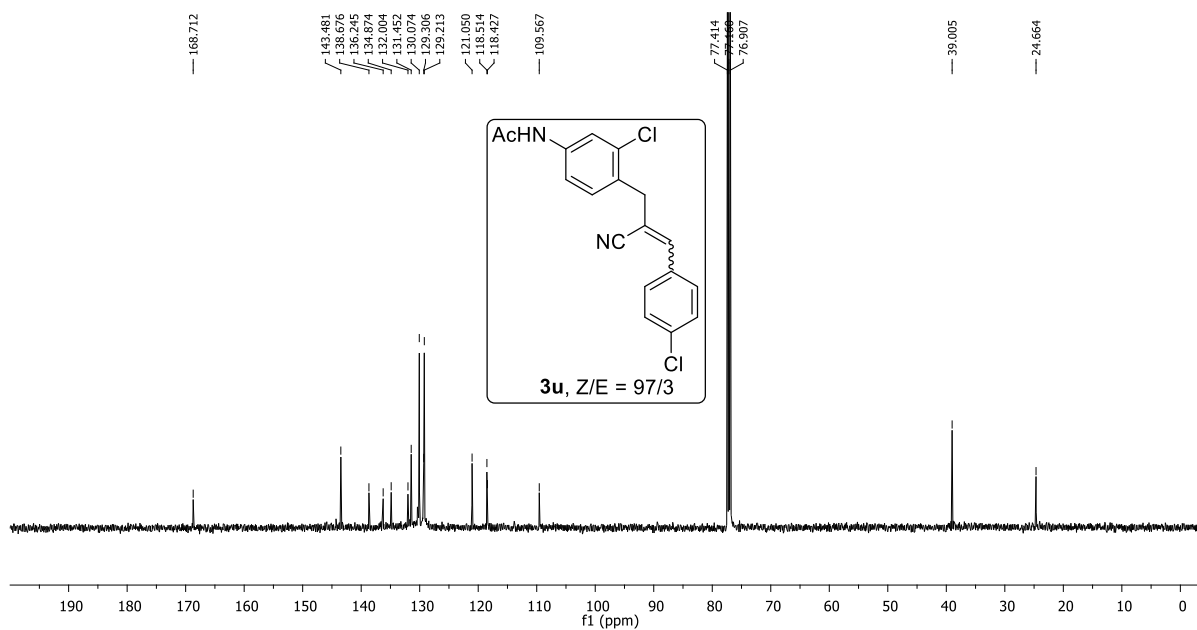

***N*-(4-(2-Cyano-3-phenylallyl)-3-fluorophenyl)acetamide (3v) :**

**<sup>1</sup>H NMR, CDCl<sub>3</sub>, 500 MHz**

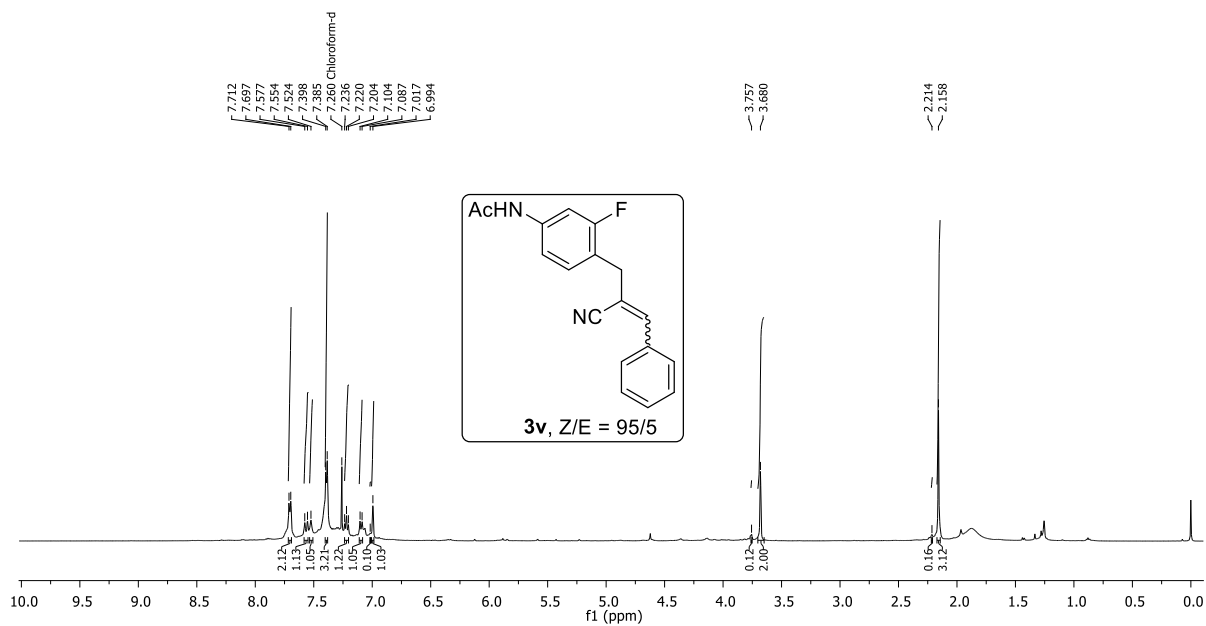

**<sup>13</sup>C{<sup>1</sup>H} NMR, CDCl<sub>3</sub>, 126 MHz**

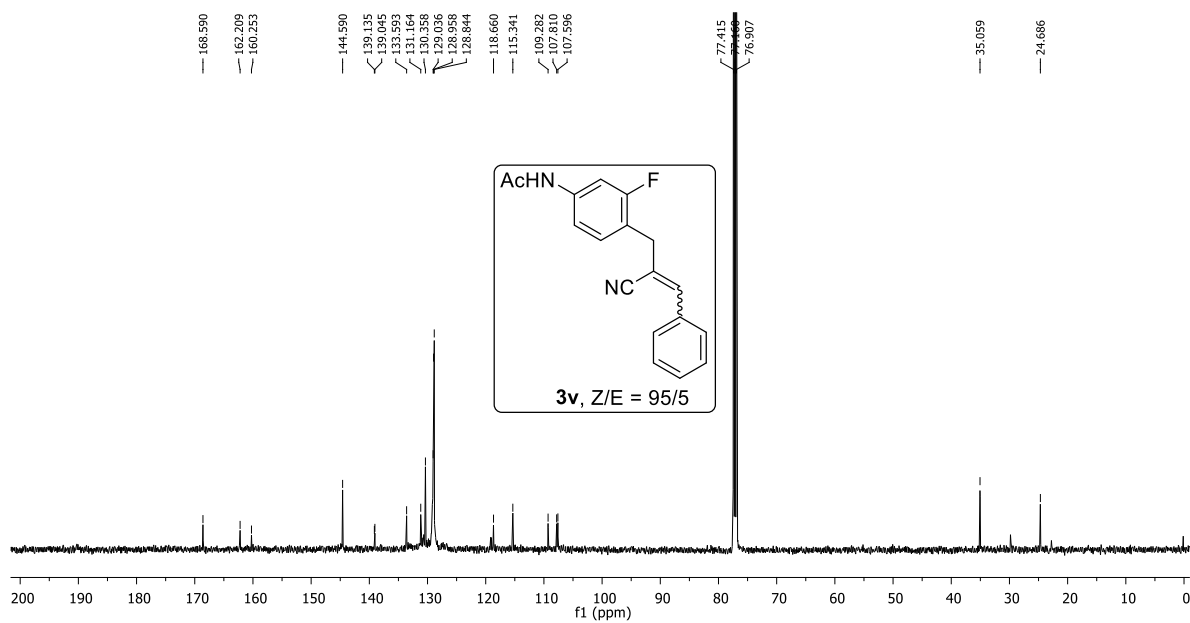

<sup>19</sup>F NMR, CDCl<sub>3</sub>, 471 MHz,

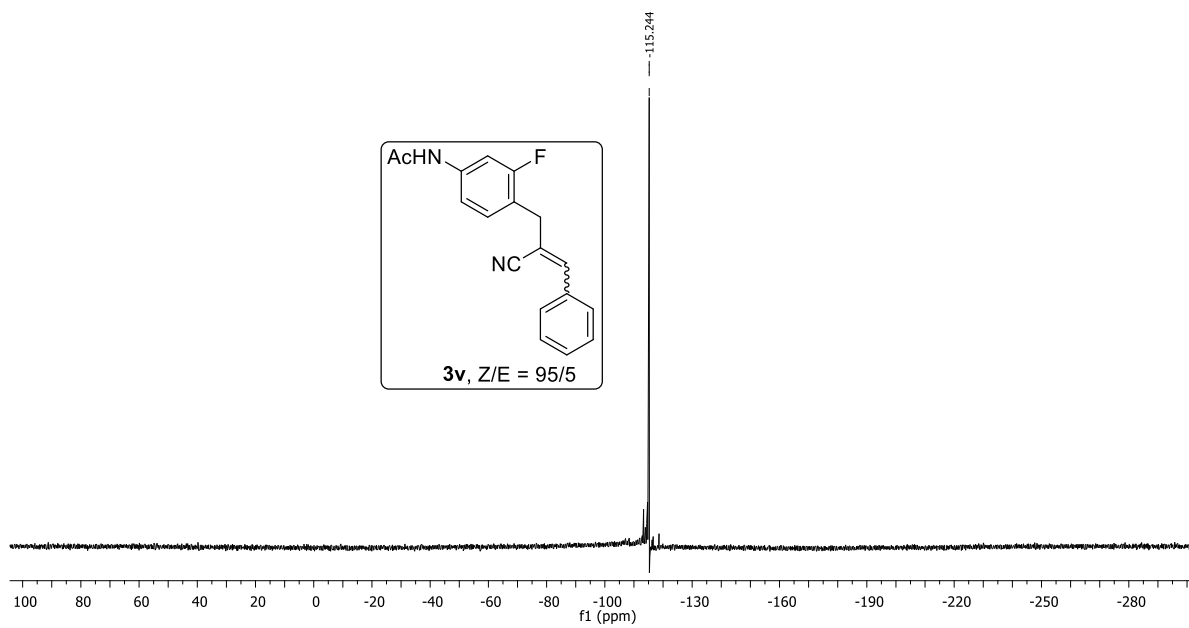

**(Z)-N-(2-(2-Cyano-3-phenylallyl)-4-methylphenyl)acetamide (4a):**  
**<sup>1</sup>H NMR, CDCl<sub>3</sub>, 500 MHz**

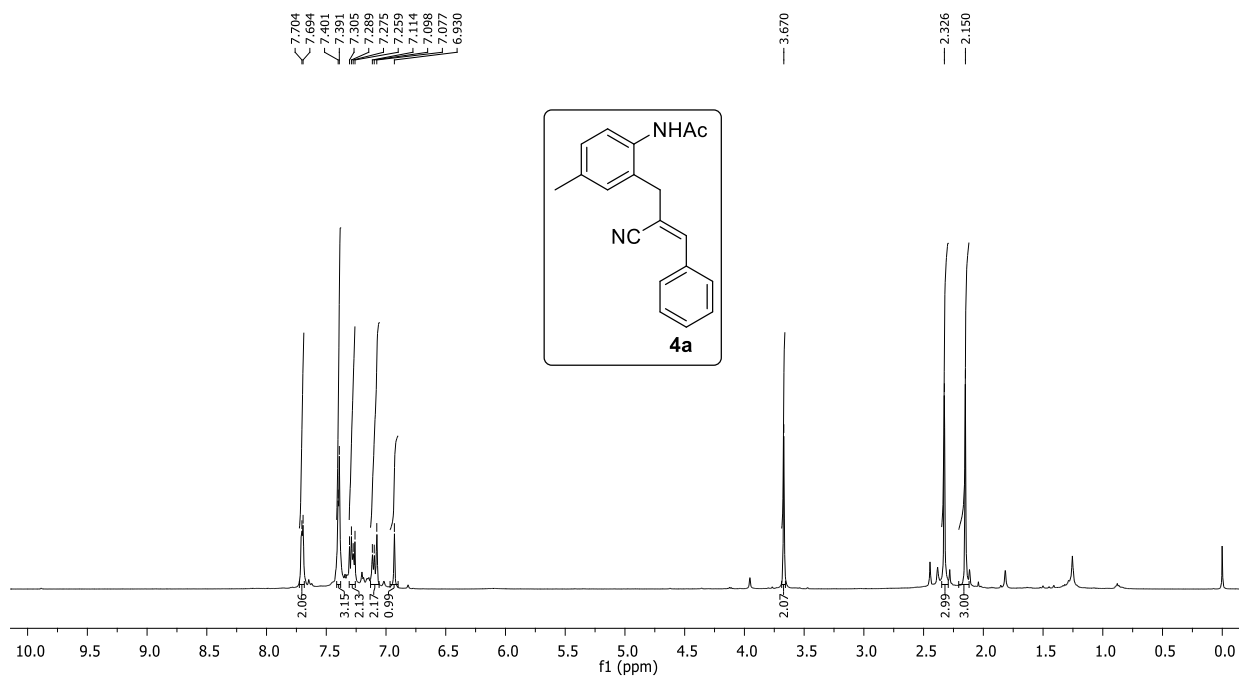

**<sup>13</sup>C{<sup>1</sup>H} NMR, CDCl<sub>3</sub>, 126 MHz**

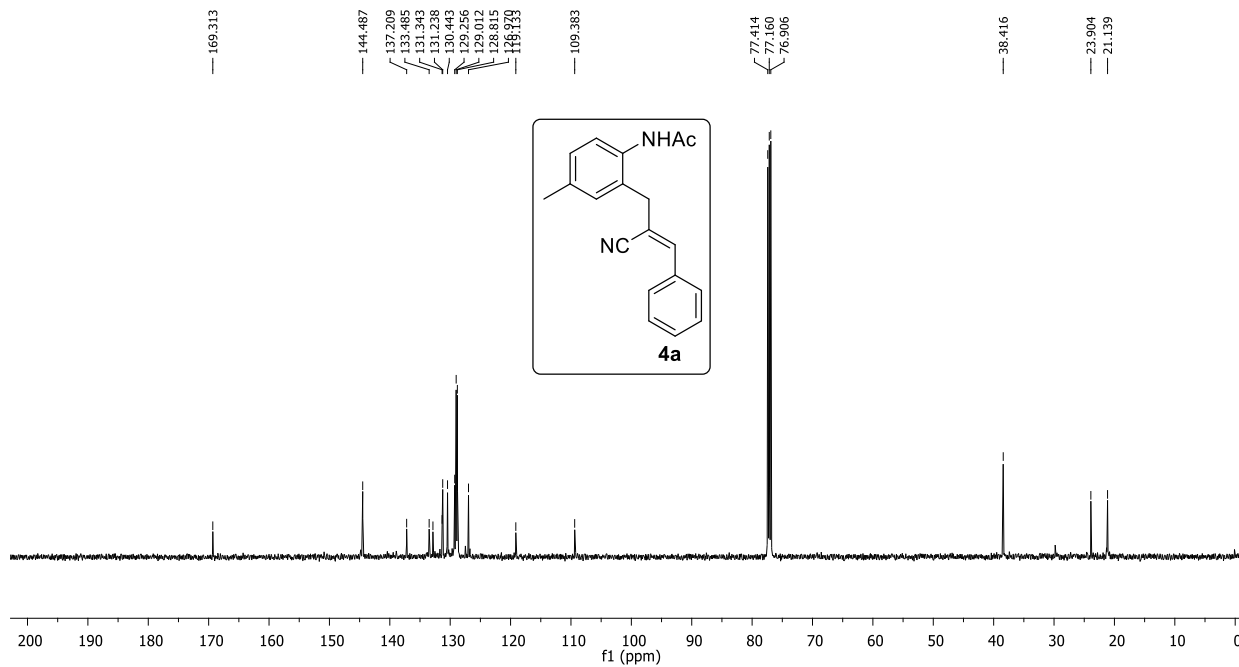

**(Z)-N-(2-(2-Cyano-3-(p-tolyl)allyl)-4-methylphenyl)acetamide (4b):**  
**<sup>1</sup>H NMR, CDCl<sub>3</sub>, 500 MHz**

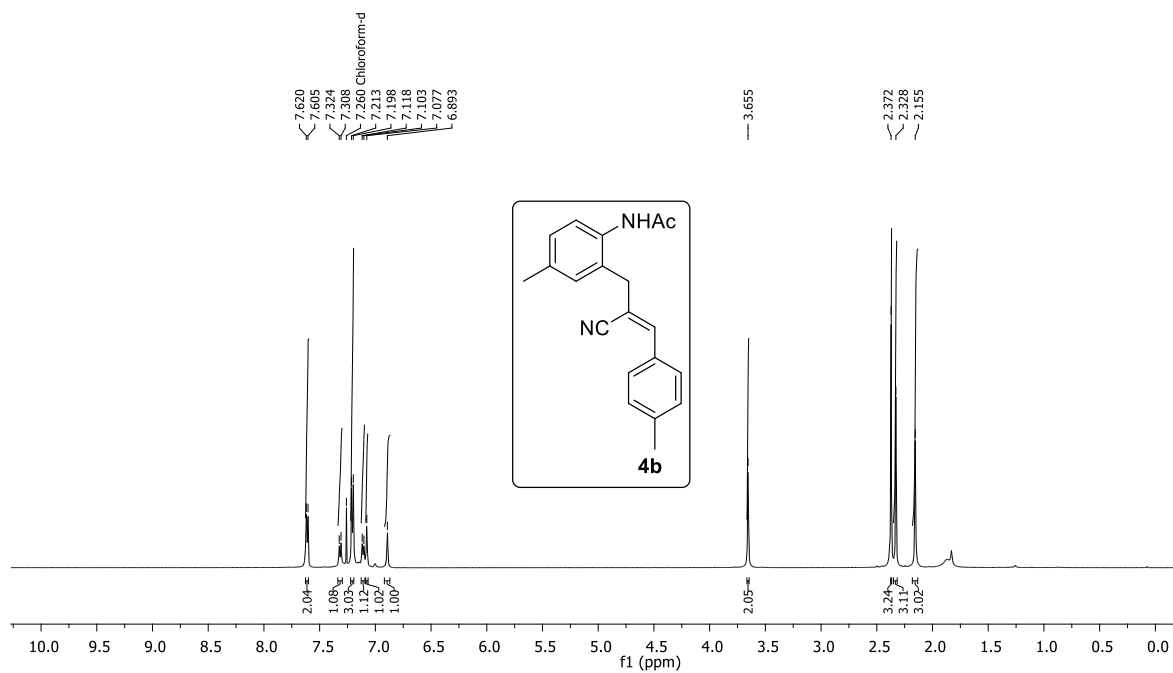

**<sup>13</sup>C{<sup>1</sup>H} NMR, CDCl<sub>3</sub>, 126 MHz**

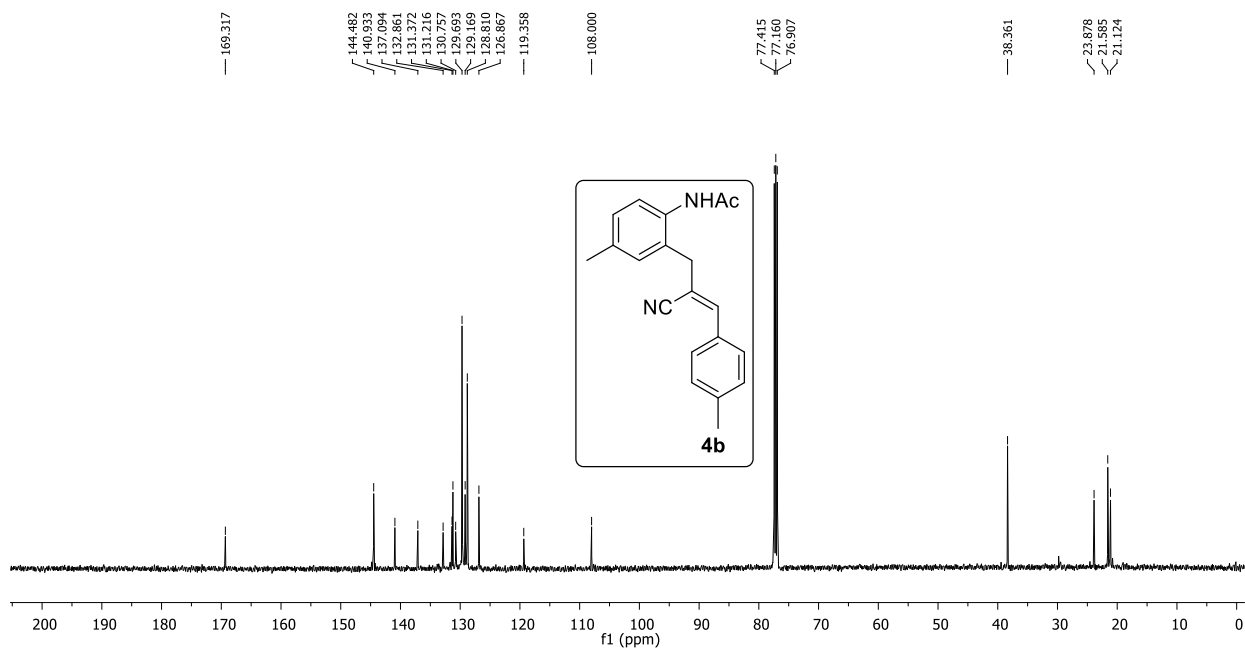

**(Z)-N-(2-(3-(4-Chlorophenyl)-2-cyanoallyl)-4-methylphenyl)acetamide (4c):**  
**<sup>1</sup>H NMR, CDCl<sub>3</sub>, 500 MHz**

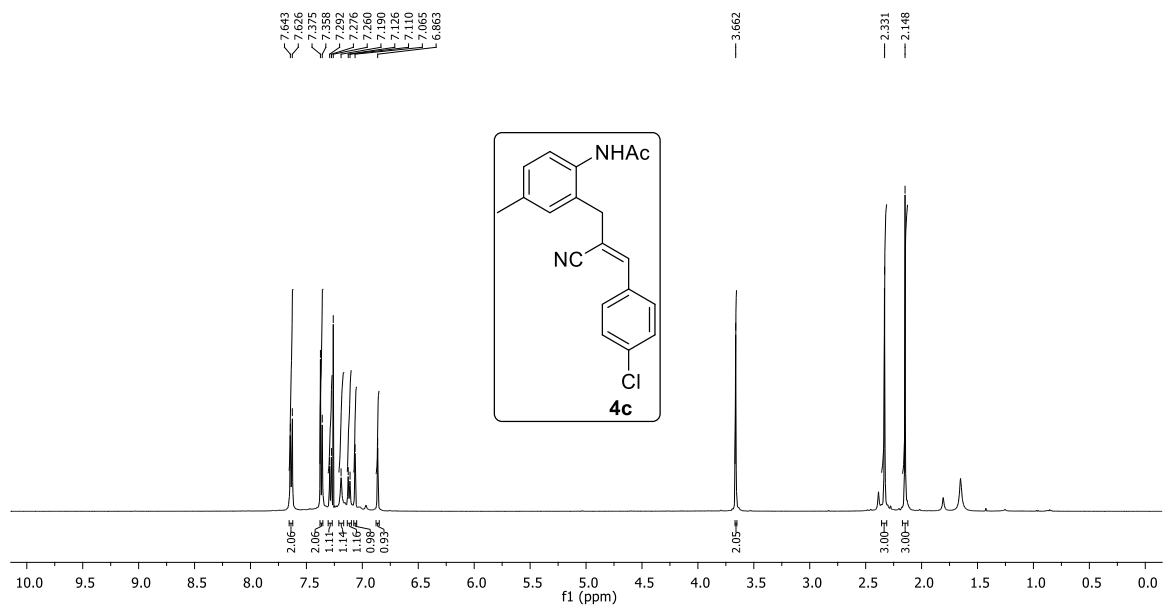

**<sup>13</sup>C{<sup>1</sup>H} NMR, CDCl<sub>3</sub>, 126 MHz**

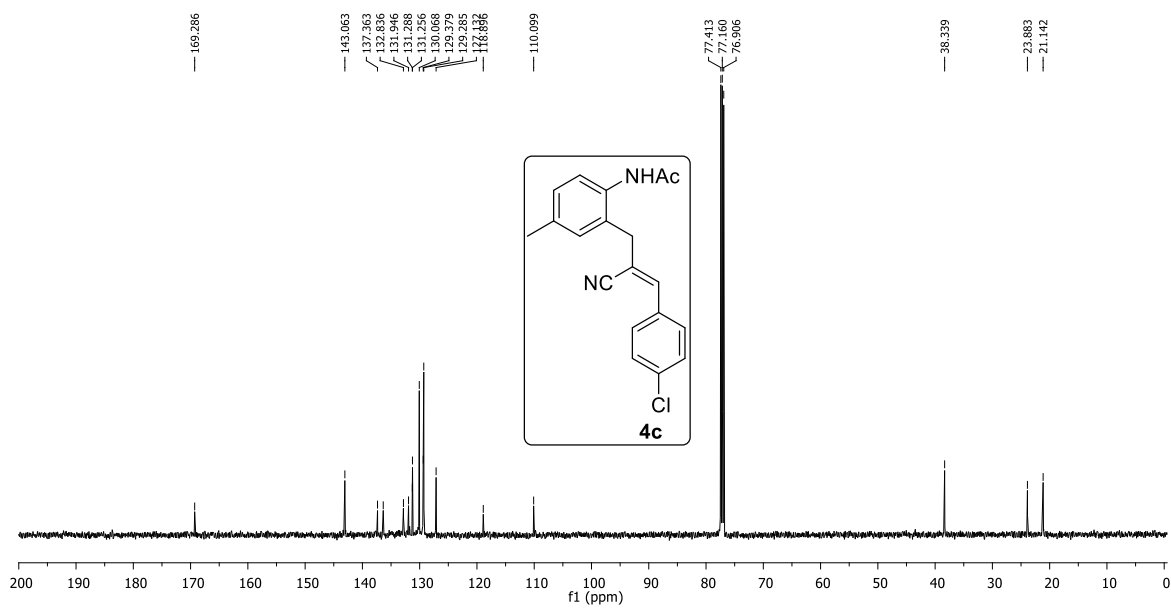

**(Z)-N-(2-(2-Cyano-3-phenylallyl)-4-ethylphenyl)acetamide (4d):**

**<sup>1</sup>H NMR, CDCl<sub>3</sub>, 500 MHz**

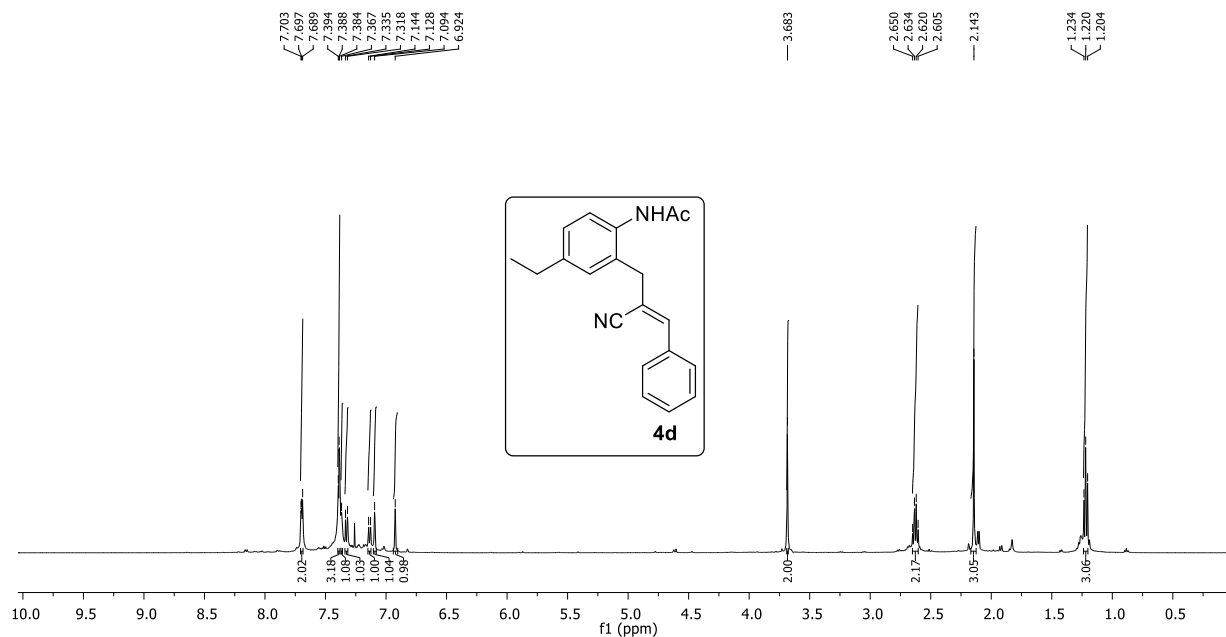

**<sup>13</sup>C{<sup>1</sup>H} NMR, CDCl<sub>3</sub>, 126 MHz**

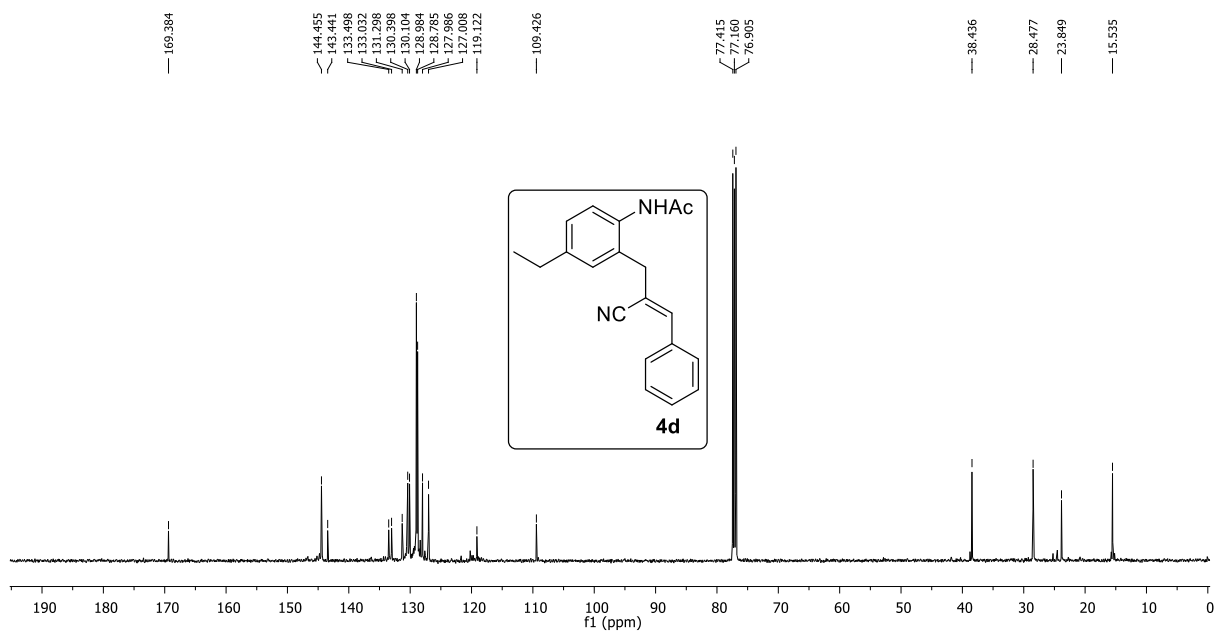

**(Z)-N-(2-(3-(4-Chlorophenyl)-2-cyanoallyl)-4-methoxyphenyl)acetamide (4e) :**  
**<sup>1</sup>H NMR, DMSO-d<sub>6</sub>, 500 MHz**

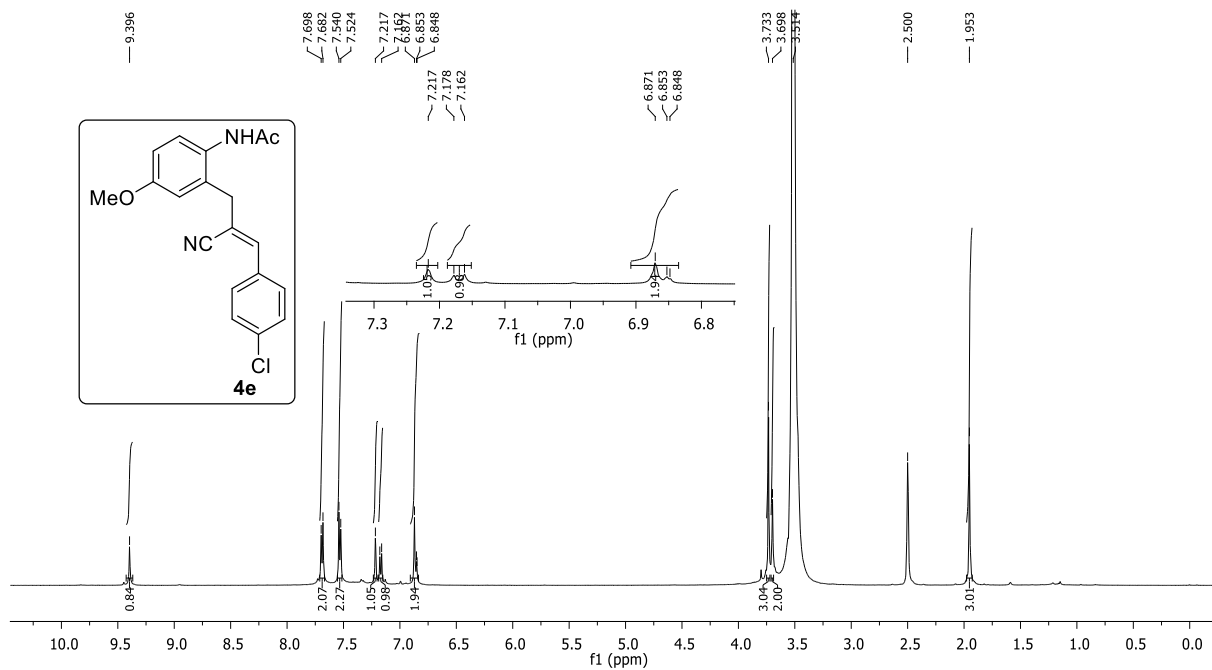

**<sup>13</sup>C{<sup>1</sup>H} NMR, DMSO-d<sub>6</sub>, 126 MHz**

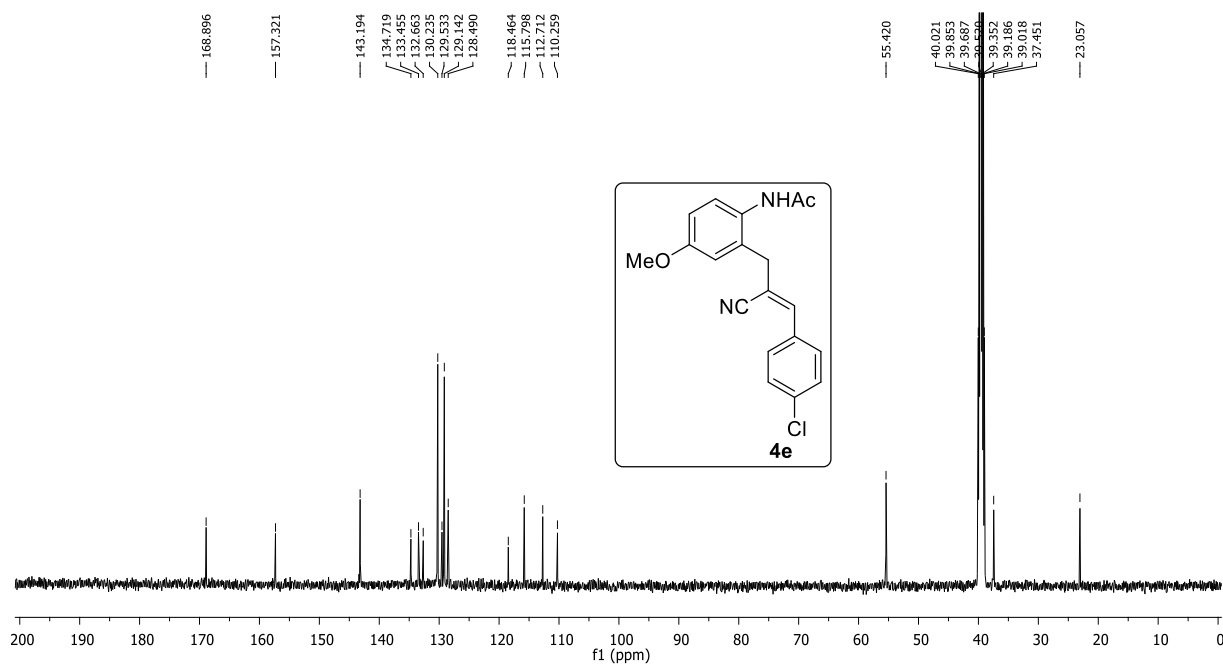



**(Z)-N-(2-(2-Cyano-3-phenylallyl)-4-methoxyphenyl)acetamide (4f):**

**<sup>1</sup>H NMR, CDCl<sub>3</sub>, 500 MHz**

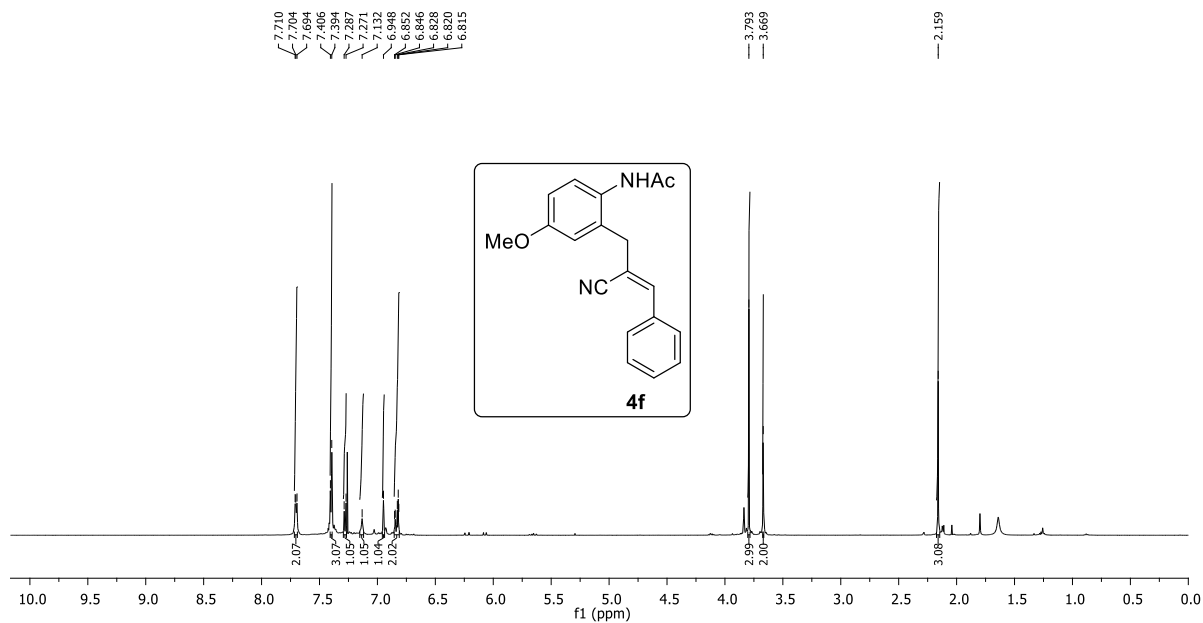

**<sup>13</sup>C{<sup>1</sup>H} NMR, CDCl<sub>3</sub>, 126 MHz**

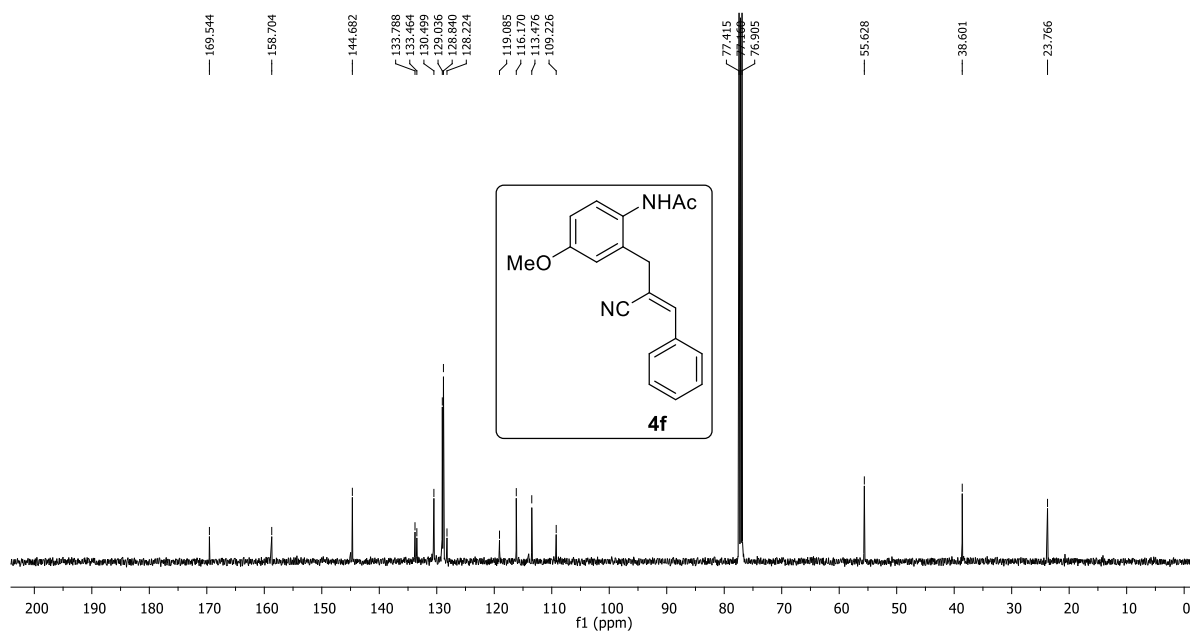

**(Z)-N-(2-(3-(4-Chlorophenyl)-2-cyanoallyl)-4-ethoxyphenyl)acetamide (4g):**  
**<sup>1</sup>H NMR, CDCl<sub>3</sub>, 500 MHz**

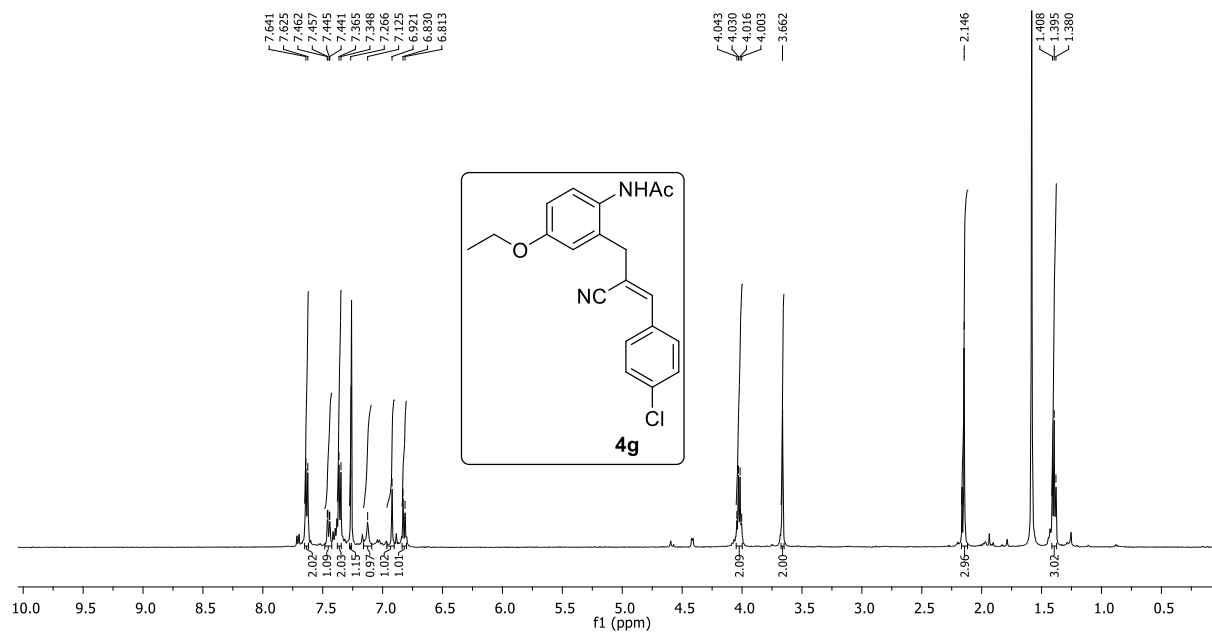

**<sup>13</sup>C{<sup>1</sup>H} NMR, CDCl<sub>3</sub>, 126 MHz**

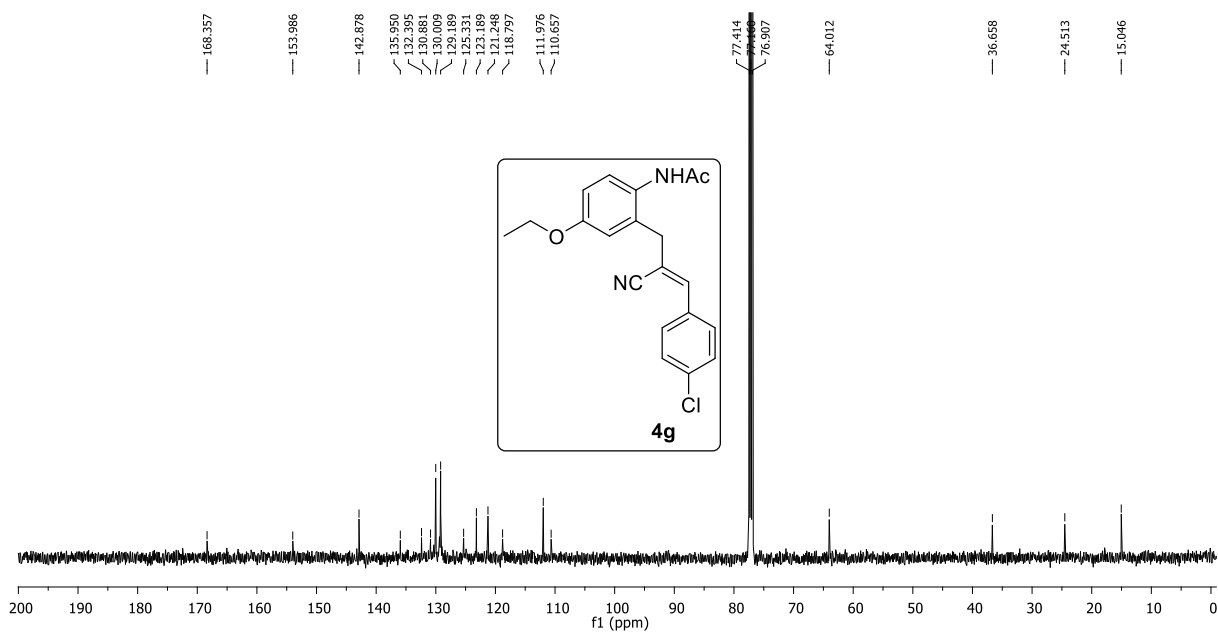

**(Z)-N-(2-(2-Cyano-3-phenylallyl)-5-fluoro-4-methylphenyl)acetamide (4h):**  
**<sup>1</sup>H NMR, CDCl<sub>3</sub>, 500 MHz**

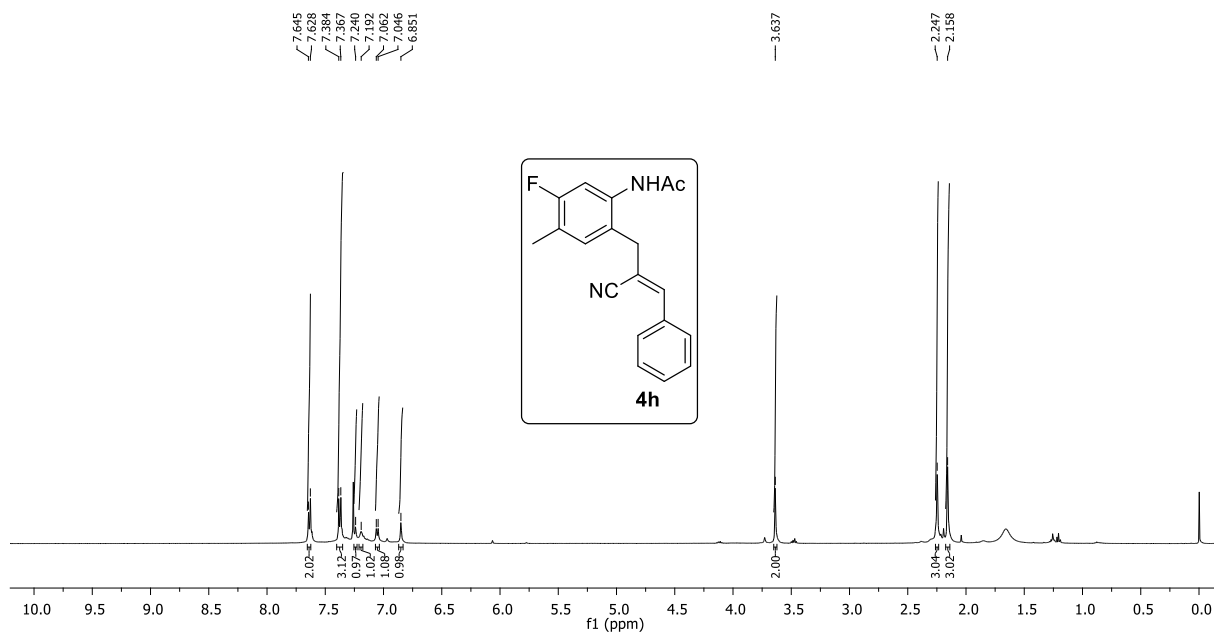

**<sup>13</sup>C{<sup>1</sup>H} NMR, CDCl<sub>3</sub>, 126 MHz**

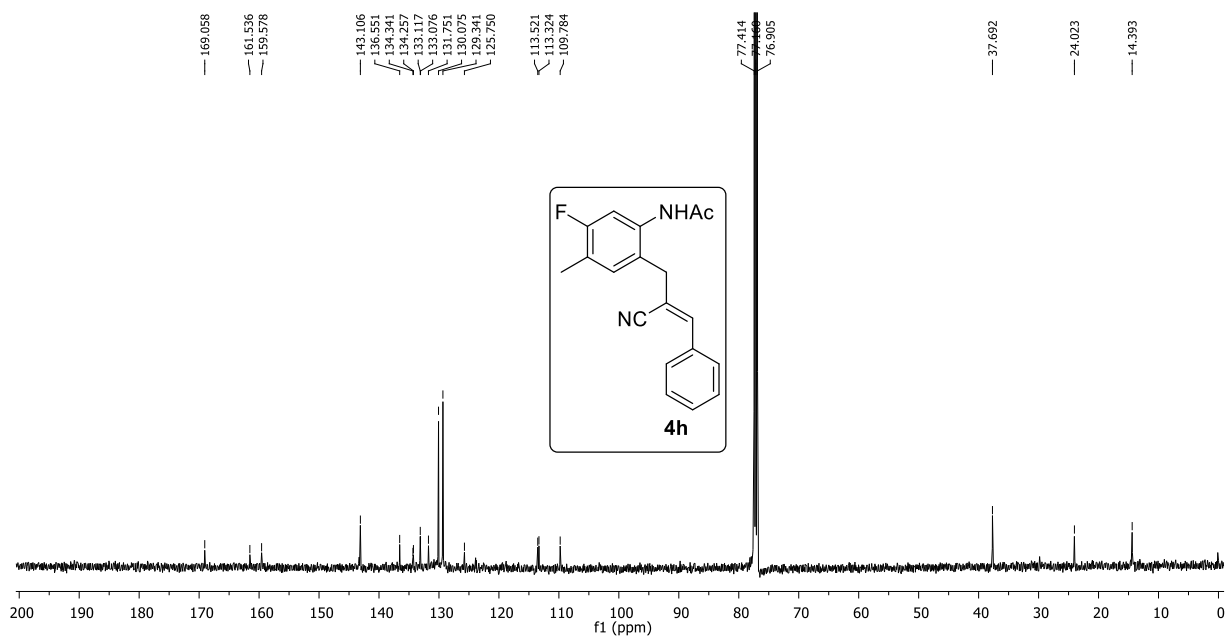

**(Z)-N-(2-(2-Cyano-3-phenylallyl)-4,6-dimethylphenyl)acetamide (4i):**  
**<sup>1</sup>H NMR, CDCl<sub>3</sub>, 500 MHz**

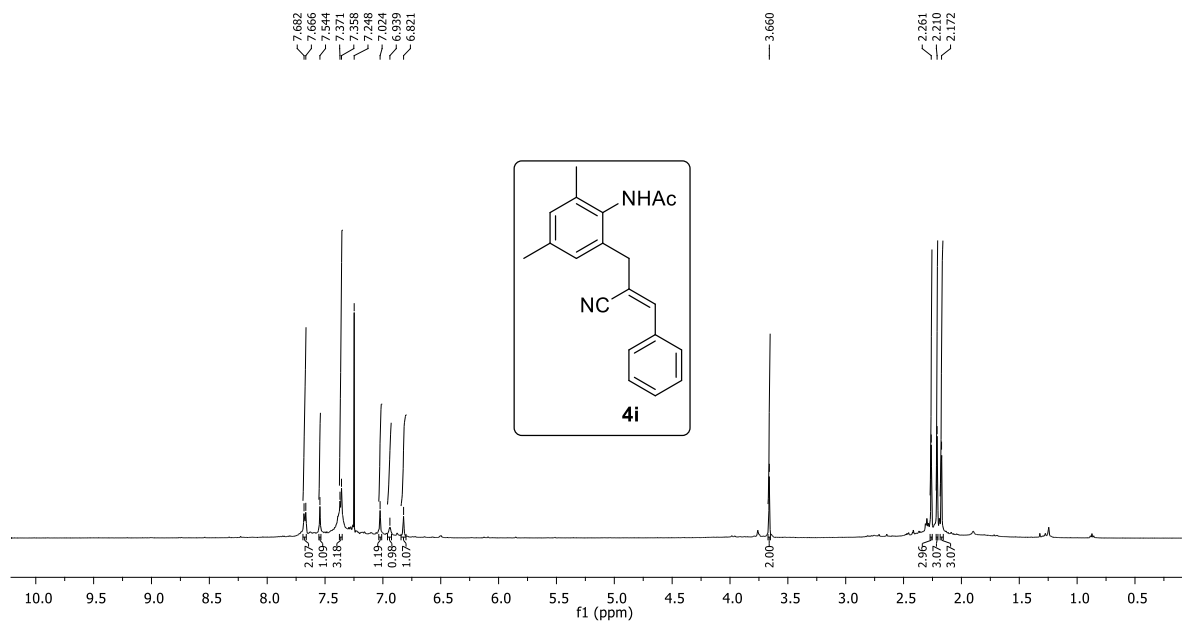

**<sup>13</sup>C{<sup>1</sup>H} NMR, CDCl<sub>3</sub>, 126 MHz**

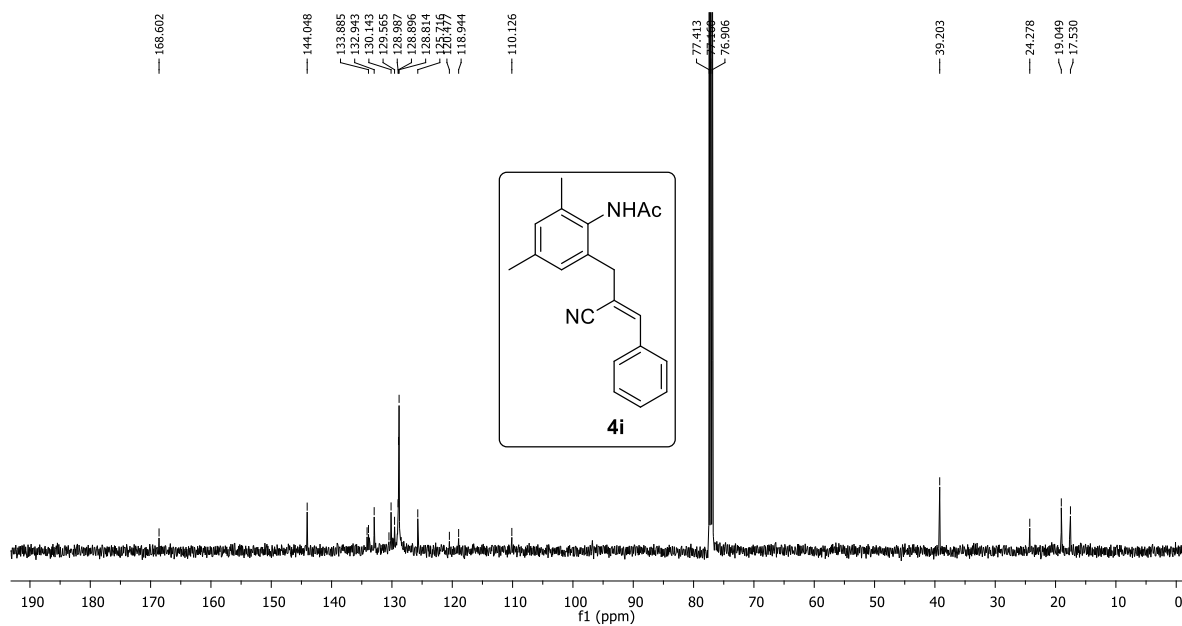

**(Z)-N-(6-(2-Cyano-3-phenylallyl)benzo[d][1,3]dioxol-5-yl)acetamide (4j):**  
**<sup>1</sup>H NMR, CDCl<sub>3</sub>, 500 MHz**

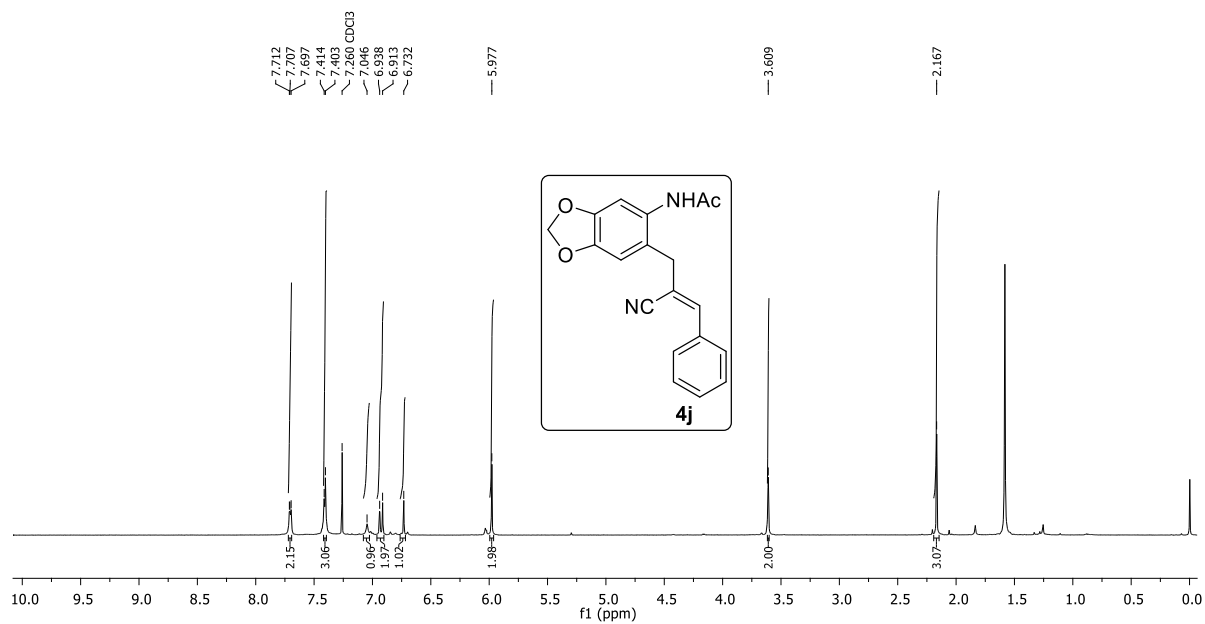

**<sup>13</sup>C{<sup>1</sup>H} NMR, CDCl<sub>3</sub>, 126 MHz**

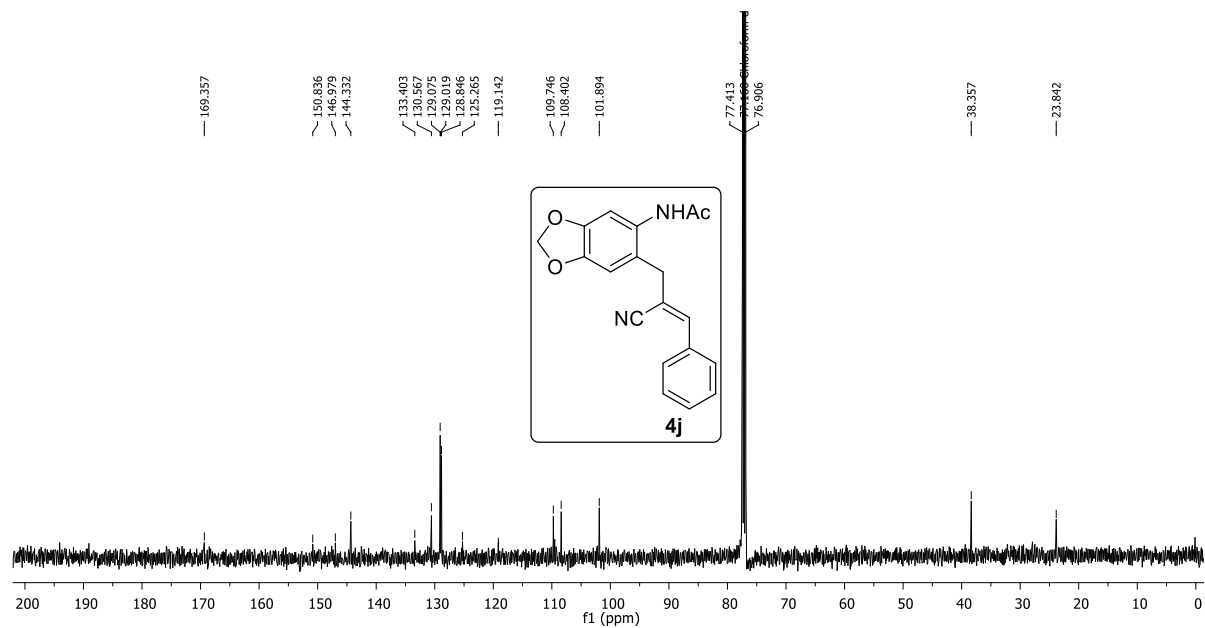

# Butyl (Z)-2-(2-acetamido-5-methoxybenzyl)-3-phenylacrylate (4k):

$^1\text{H}$  NMR,  $\text{CDCl}_3$ , 500 MHz

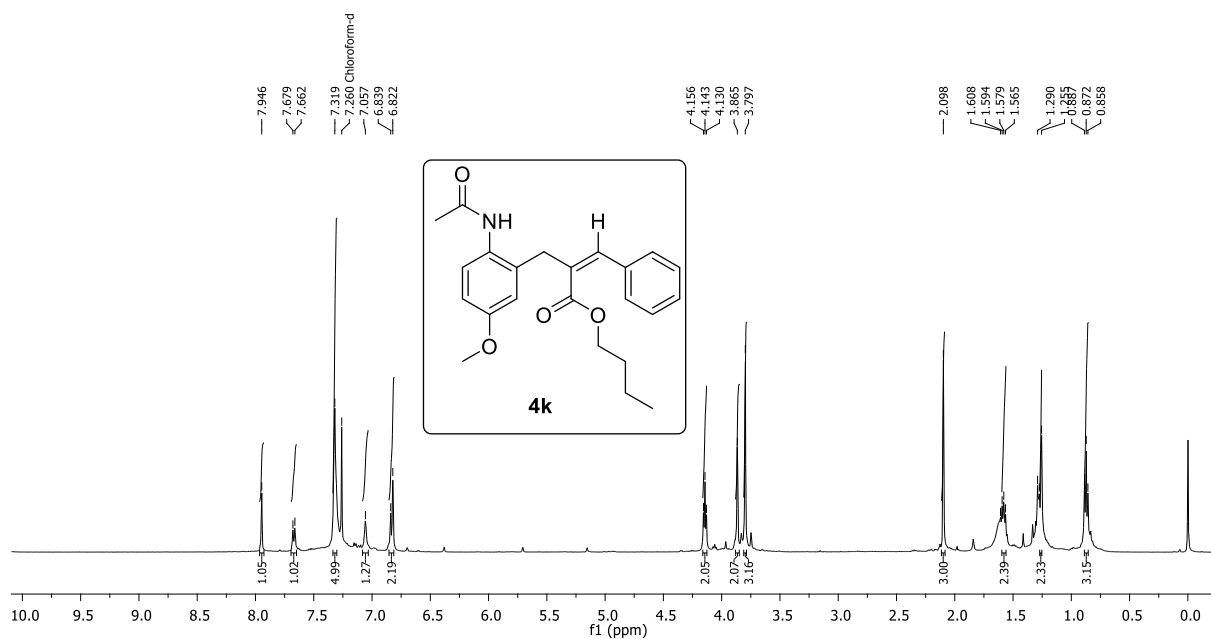

$^{13}\text{C}\{^1\text{H}\}$  NMR,  $\text{CDCl}_3$ , 126 MHz

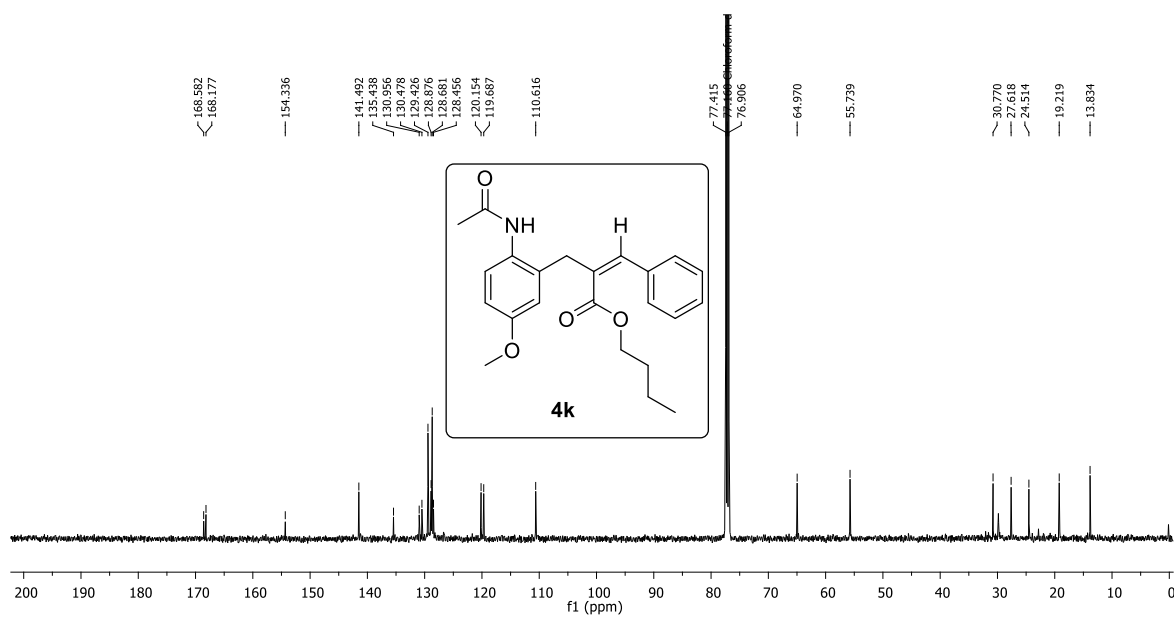

# Methyl (Z)-2-(2-acetamido-5-methylbenzyl)-3-phenylacrylate (**4I**):

$^1\text{H}$  NMR,  $\text{CDCl}_3$ , 500 MHz

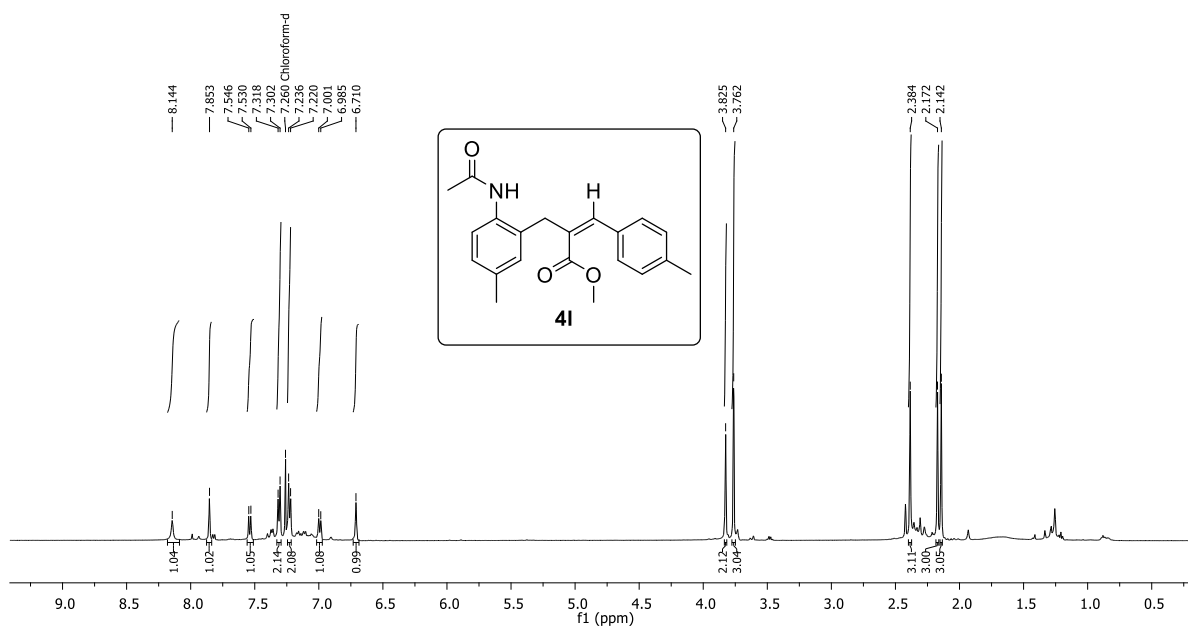

$^{13}\text{C}\{^1\text{H}\}$  NMR,  $\text{CDCl}_3$ , 126 MHz

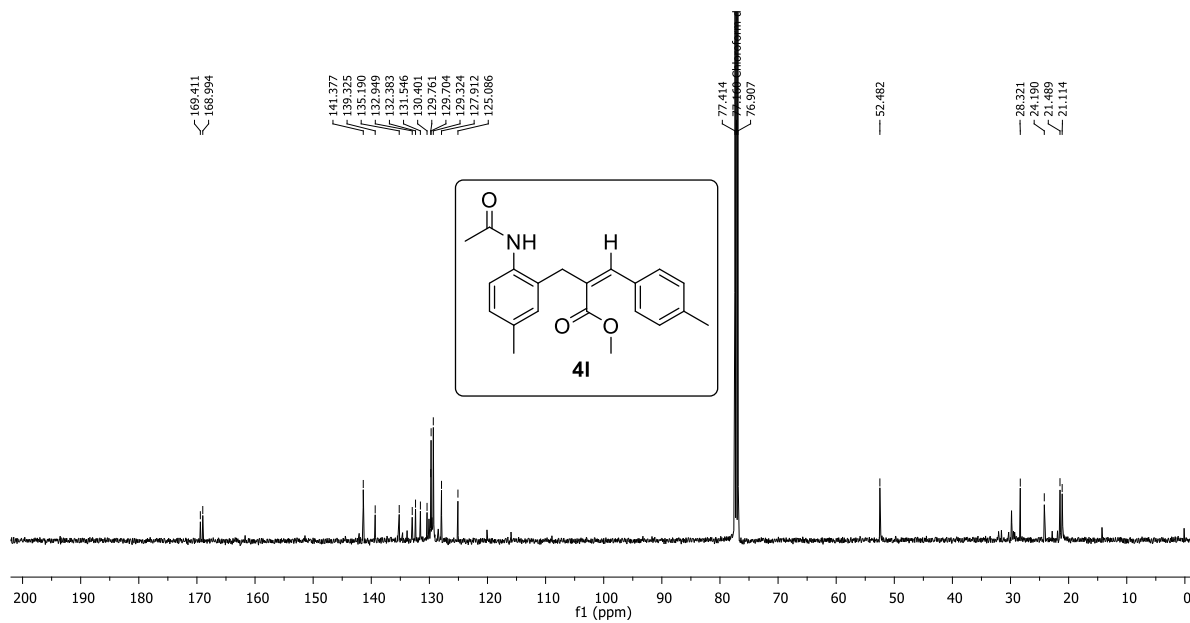

# Ethyl (Z)-2-(2-acetamido-5-methylbenzyl)-3-(4-chlorophenyl)acrylate (4m):

$^1\text{H}$  NMR,  $\text{CDCl}_3$ , 500 MHz

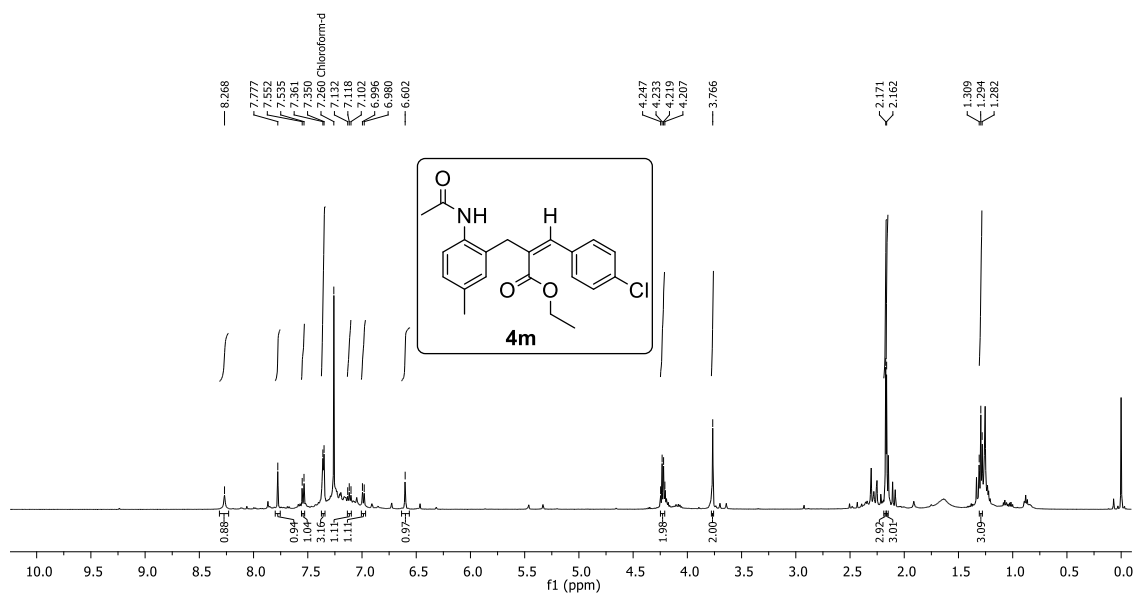

$^{13}\text{C}\{^1\text{H}\}$  NMR,  $\text{CDCl}_3$ , 126 MHz

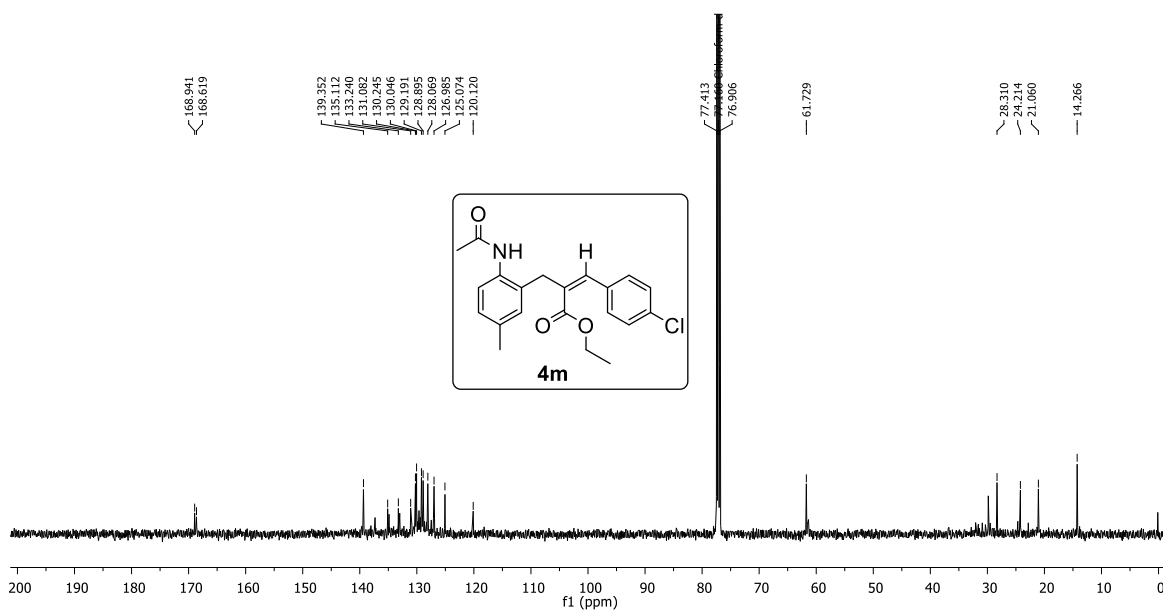



## 2. NOESY Spectrum of the Product 3e

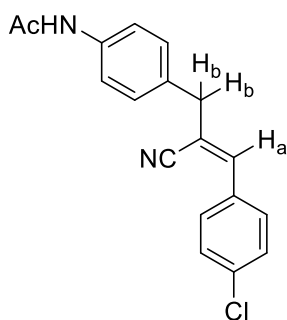

1. The  $^1\text{H}$  NMR shows 4 types of aromatic hydrogens with the splitting pattern of doublet which correlates with *para* isomer.
2. No cross peak is observed between minor  $\text{H}_b$  and  $\text{H}_a$  in the 2D NMR spectrum. Also, no cross peak between  $\text{H}_b$  and  $\text{CH}_3\text{CO}$  that suggests that the *ortho* isomer is not formed
3. NOE correlation is observed between  $\text{H}_a$  ( $\delta$  6.89, s) and  $\text{H}_b$  ( $\delta$ , 3.65, s). Based on the  $^1\text{H}$  NMR and NOESY Spectrum of **3e**, it is concluded that the major product is (*Z*)-isomer with the *Z/E* ratio 87:13.

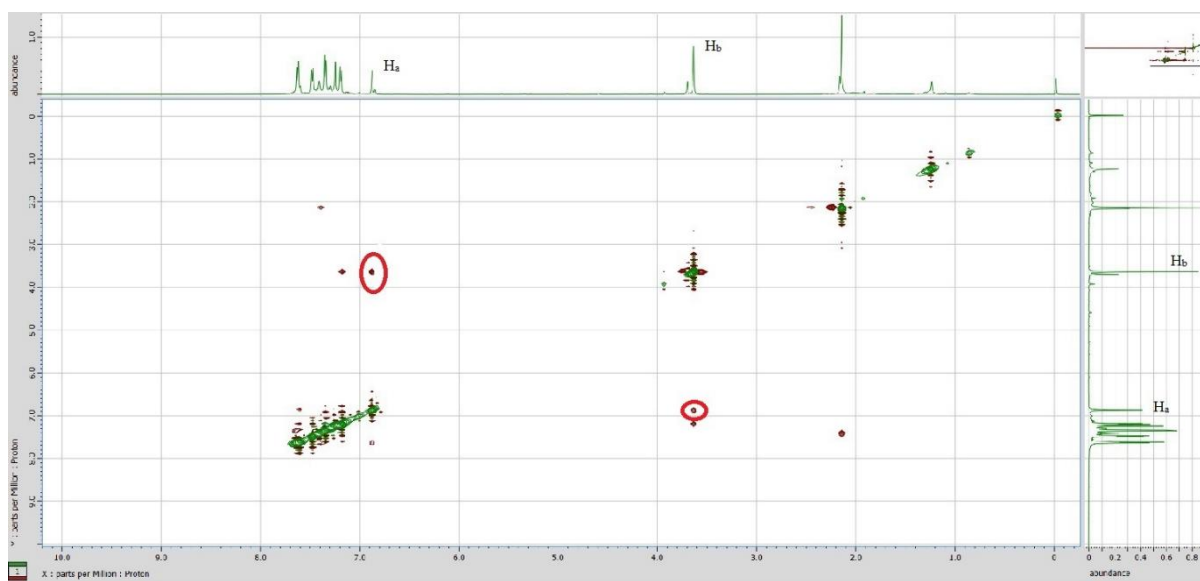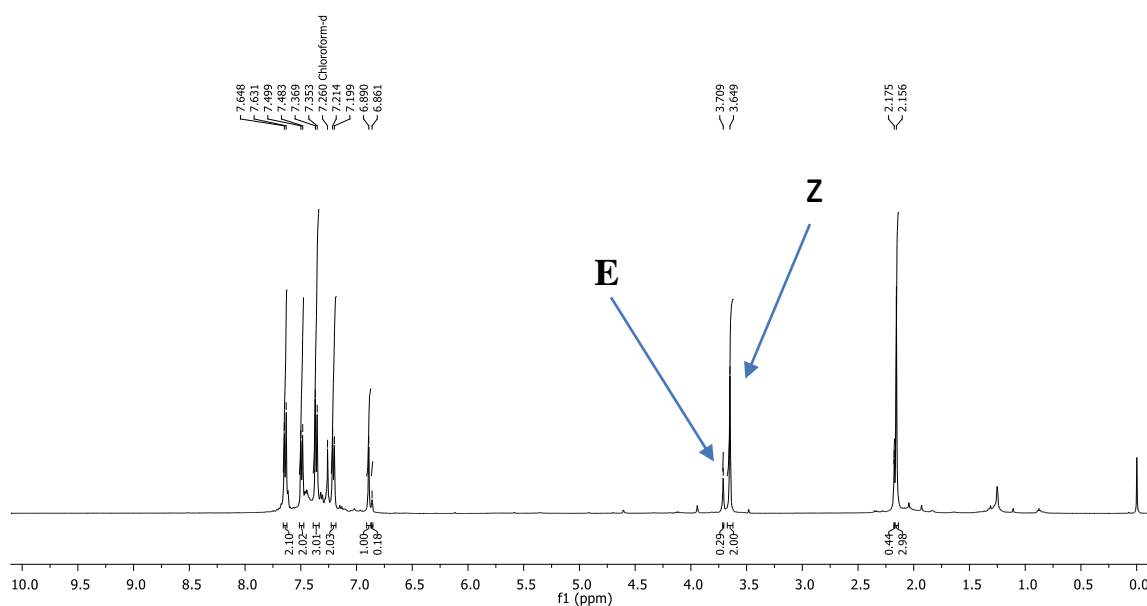

$^1\text{H}$  NMR of **3e**

### 3. NOESY Spectrum of the Product 4b

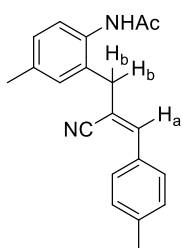

NOE correlation is observed between H<sub>a</sub> ( $\delta$  6.89, s) and H<sub>b</sub> ( $\delta$ , 3.66, s). Based on the <sup>1</sup>H NMR and NOESY Spectrum of **4b**, it is concluded that the product is (Z)-isomer.

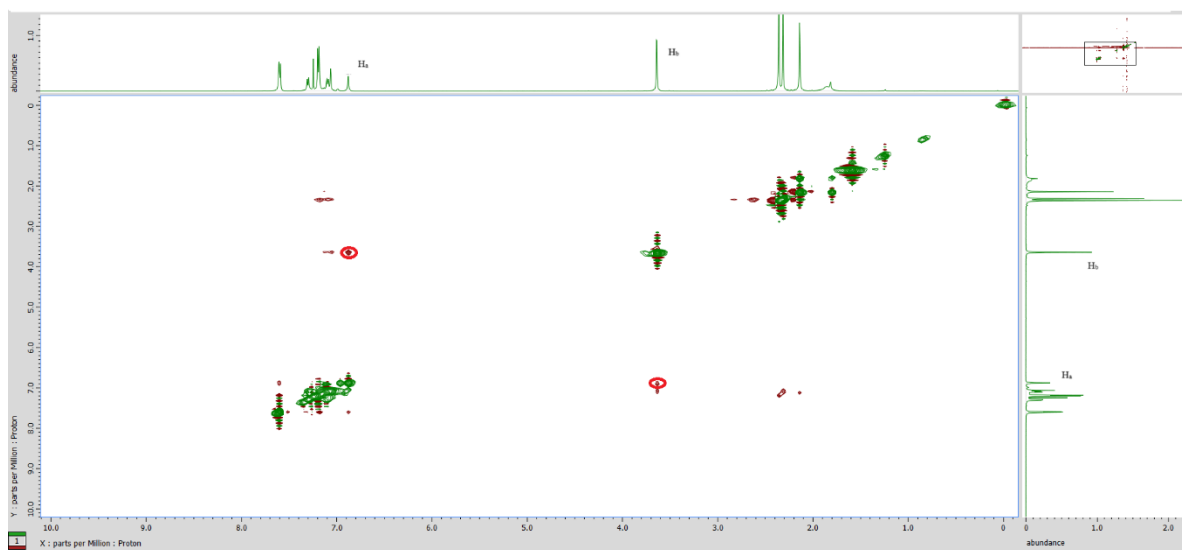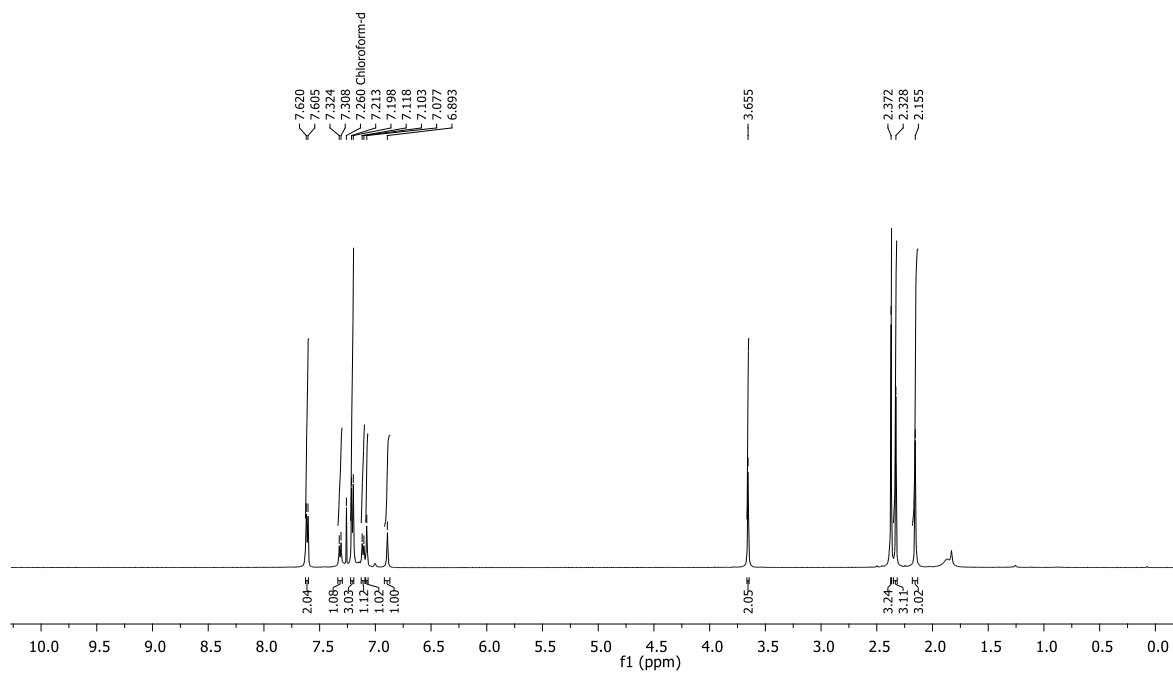

<sup>1</sup>H NMR of **4b**

#### 4. HRMS of the TEMPO Adduct 3a':

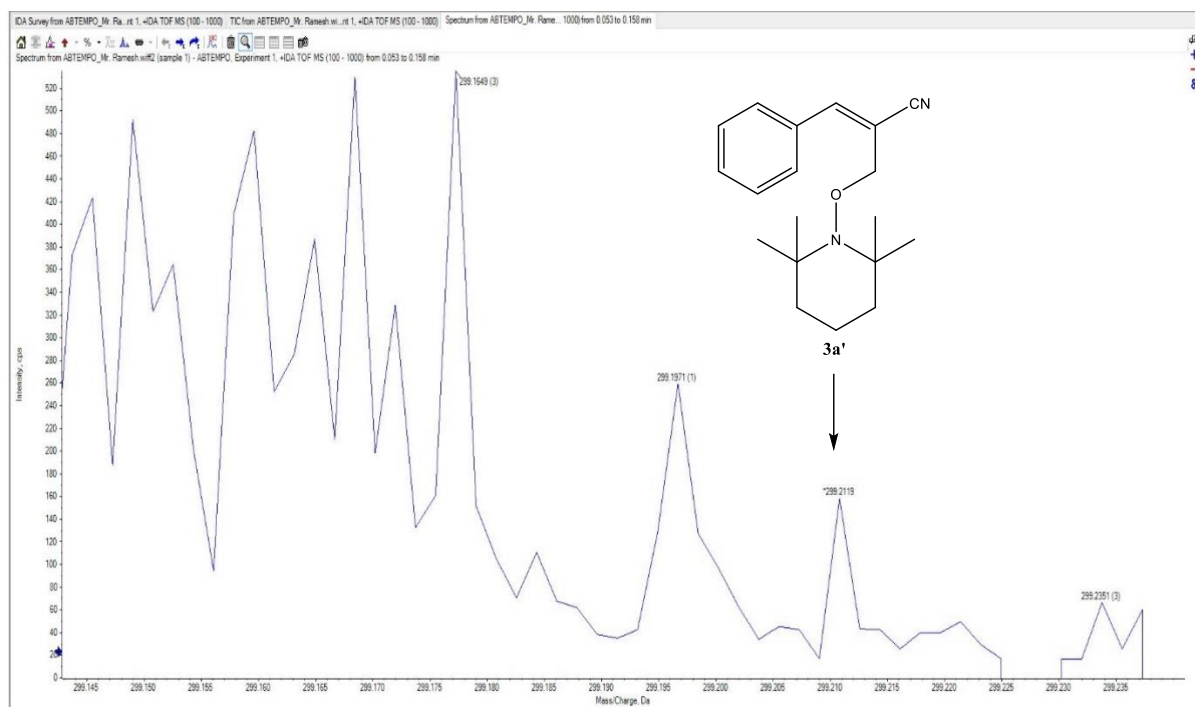

Supplement: d3ob01480k1.pdf [file d3ob01480k1.pdf]
